# Supplementary material for: Long-Distance Lanthanide Migration Regulated by Interfacial Lattice Strain in Nanostructure
Source: Research Square preprint supplement (doi:10.21203/rs.3.rs-6624432/v1), 2025-05-20
Supplement: Supplementary file 1 [file eb81297b564a711b9180d2bb.docx]

Supplementary Information

**Long-Distance Lanthanide Migration Regulated by Interfacial Lattice Strain in Nanostructure**

Yachong Liu1, Xi Zou1, Xinle Tian1, Ruizhe Xiao2, Yan Su3, Hao Jiang4, Xian Qin4*, Sanyang Han5*, Hongjie Zhang6* and Qianqian Su1*

1Institute of Nanochemistry and Nanobiology, Shanghai University, Shanghai 200444, China

2The High School Attached to Hunan Normal University, Changsha 410006, China

3Genome Institute of Singapore, Agency of Science Technology and Research, 138672, Singapore.

4Strait Institute of Flexible Electronics (SIFE, Future Technologies), Fujian Key Laboratory of Flexible Electronics, Fujian Normal University and Strait Laboratory of Flexible Electronics (SLoFE), Fuzhou 350117, China

5Institute of Biopharmaceutical and Health Engineering, Tsinghua Shenzhen International Graduate School (SIGS), Tsinghua University, Shenzhen 518055, China

6State Key Laboratory of Rare Earth Resource Utilization, Changchun Institute of Applied Chemistry, Chinese Academy of Sciences, Changchun 130022, China; School of Applied Chemistry and Engineering, University of Science and Technology of China, Hefei 230026, China; Department of Chemistry, Tsinghua University, Beijing 100084, China

*Corresponding author. Email: chmsqq@shu.edu.cn (Q.S.); ifexqin@fjnu.edu.cn (X.Q.); hansanyang@sz.tsinghua.edu.cn (S.H.); hjzhang2019@mail.tsinghua.edu.cn (H.Z.).

**Contents:**

Supplementary Notes 1-2

Supplementary Figs. 1-25

Supplementary Tables 1-5

Supplementary References

Supplementary Text

**Supplementary Note 1**. **Quantum Mechanical Calculation**

To investigate the adsorption of Nd atoms on the surface of NaErF4 nanocrystals, we performed first-principles calculations based on density functional theory (DFT) using the Vienna ab initio simulation package with the projector augmented wave method1,2*.* In our DFT calculations, the exchange-correlation interactions were approximated using the Perdew–Burke–Ernzerh generalized gradient approximation (GGA-PBE)3. The kinetic energy cutoff for the plane wave was set to 520 eV, the energy convergence criterion was 1 × 10-5 eV, and the maximum force on each relaxed atom was maintained below 0.02 eV/Å.

We studied the adsorption of Nd on the relatively stable (0001) and (1000) surfaces of the NaErF4 crystal. The surface structures were modeled by creating a supercell with atomic slabs, each separated by a 15-Å-thick vacuum layer (Supplementary Fig. 2). Note that YF-terminated surfaces were considered, as they exhibit greater stability compared to NaF- and NaYF-terminated surfaces4*.*Additionally, the bottom few layers of the slabs were fixed during structural relaxation, mimicking the core area of the nanocrystals. Furthermore, to examine the influence of interfacial strain on the adsorption behavior of the Nd atom, we applied biaxial tensile strains of 2.74% and 6.15% to the (0001) and (1000) surfaces, respectively, by enlarging the lattice constant of the supercells.

**Supplementary Note 2.**

To probe the binding strength between the Nd atom and the substrate, we calculated the adsorption energy as

Ea = E(combined) – [E(substrate) + E(atom)]

where E(combined), E(substrate), and E(atom) are the energies of the adsorbed system, substrate, and isolated atom, respectively.

For the (0001) surface, three adsorption sites were considered, with the Nd on top of an Ern (n = 1 or 2) and the hollow site of an erbium hexagon. Note that Er1 and Er2 refer to erbium atoms located in the Er-Er-Er and Er-Na-Er chains, respectively (as depicted along the normal of the (0001) surface). Upon atomic relaxation, the calculated total electronic energies indicated a preference for Nd adsorption either at the Er1 or hollow sites, rather than the Er2 site (Supplementary Fig. 3). When a biaxial strain of 2.74% was applied, the adsorption energy for the Er1 site changed minimally compared to its strain-free counterpart, whereas the adsorption energy for the hollow site showed a marked increase.

In the case of the (1000) surface, two adsorption sites were considered: the Nd on top of an Er and the hollow site of an erbium rectangle (Supplementary Fig. 4). The relaxed atomic structure demonstrated that Nd tends to be adsorbed at the off-center site of the rectangle. Notably, when biaxial strains of 2.74% (along the a-axial) and 6.15% (along the b-axial) were applied, the calculated adsorption energy significantly increased compared to their strain-free counterpart. It is noteworthy that the external strain promotes the diffusion of surface atoms, as evidenced by the noticeable movement of surface atoms during structure relaxation. Given that the simulation of atomic relaxation was carried out at 0 K, greater diffusion is anticipated during the synthesis of core-shell nanocrystals, as the synthesis temperature is approximately 573 K. Additionally, it is observed the binding of the Nd atom is stronger on the (1000) surface than on the (0001) surface, regardless of the presence of external strain.


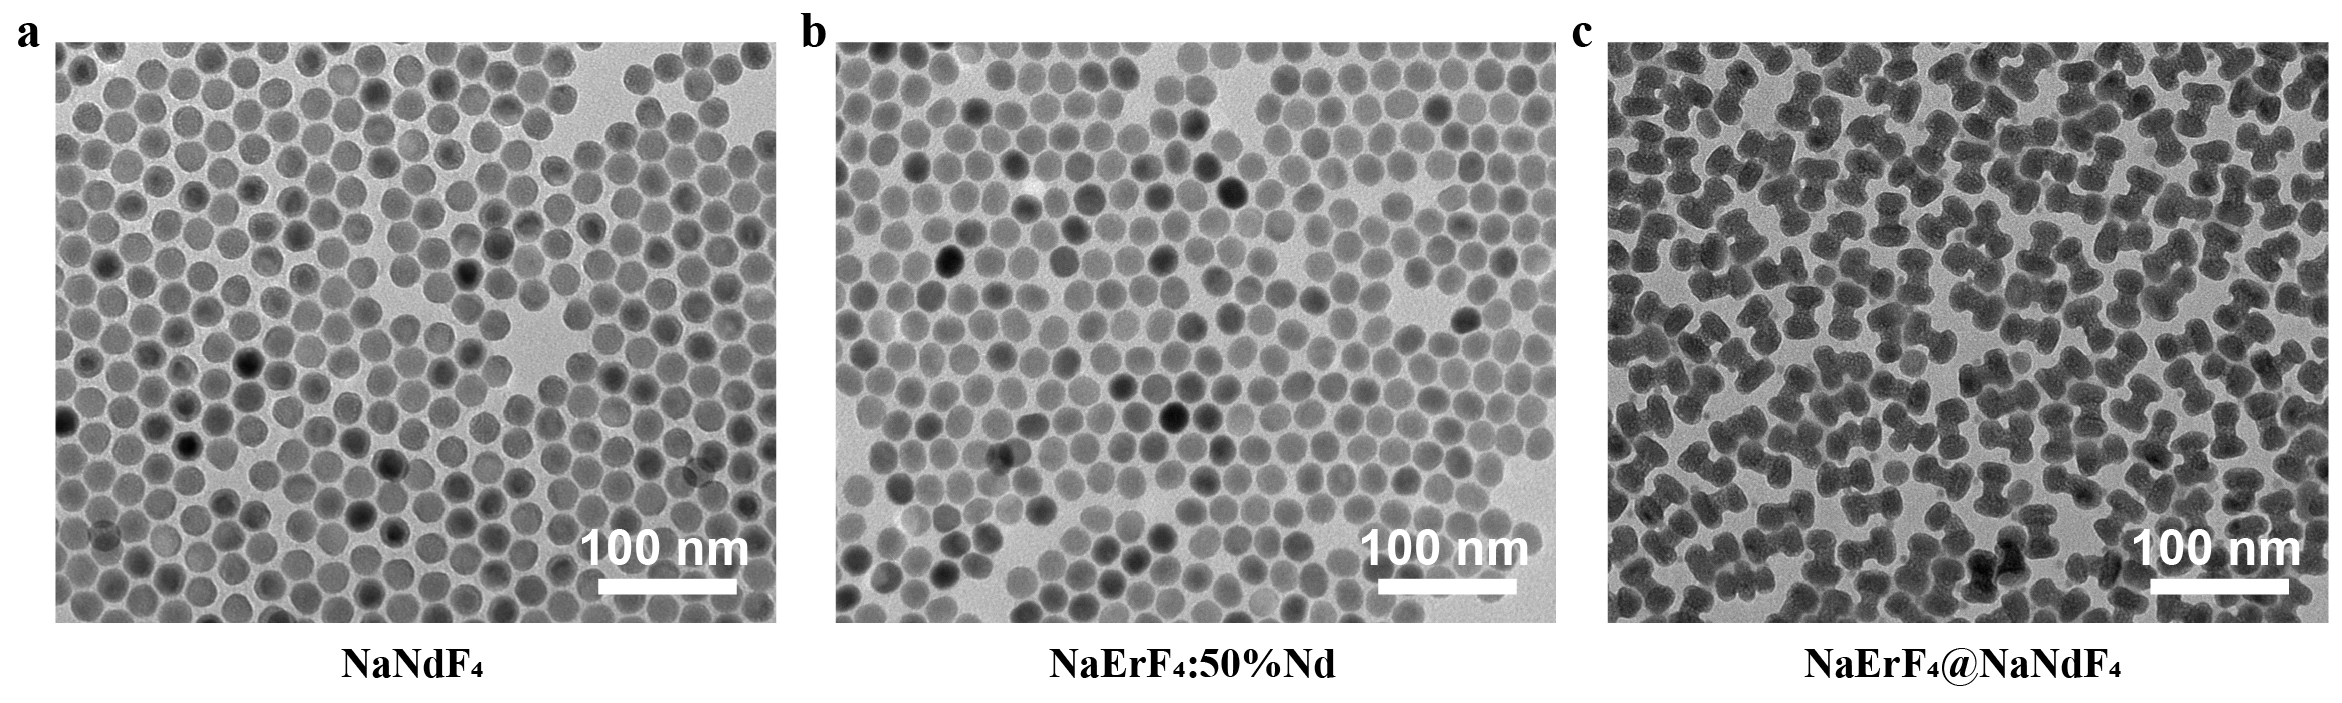


**Supplementary Figure 1.** (a-c)TEM images of NaNdF4, NaErF4:50%Nd, NaErF4@NaNdF4 (40.0 μmol/min) nanocrystals.


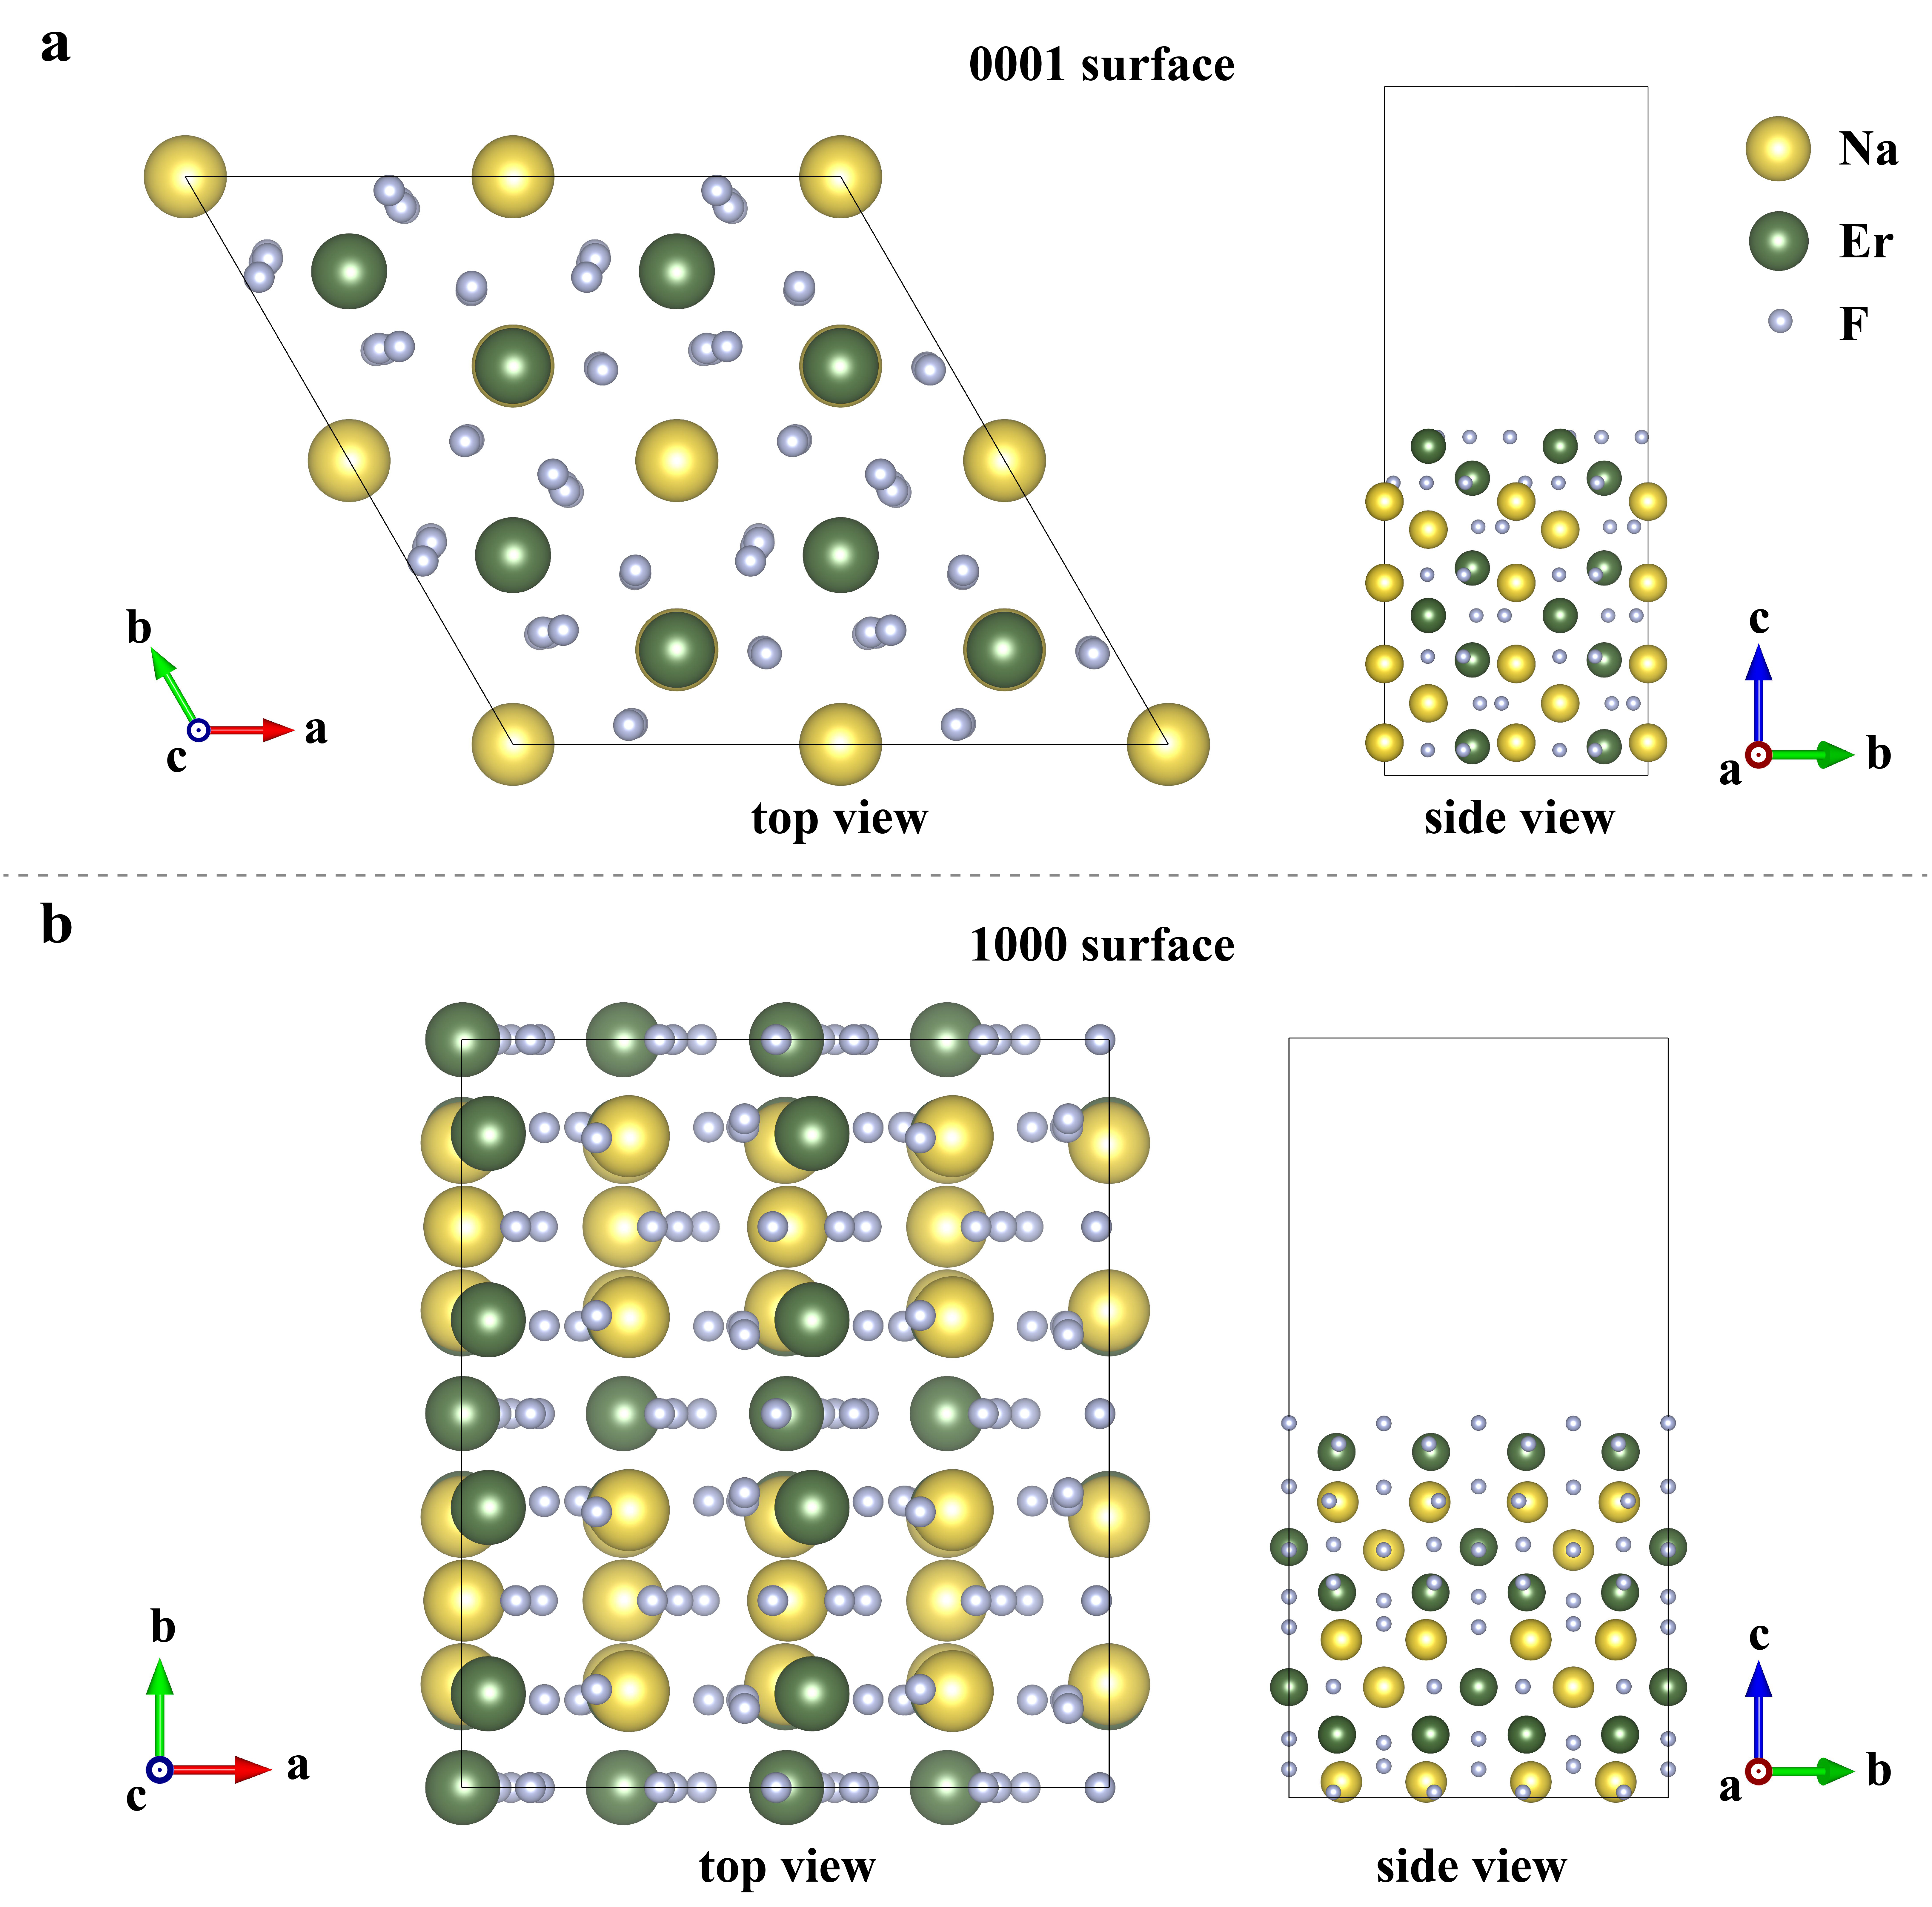


**Supplementary Figure 2.** (a,b) Optimized slab models of (0001) and (1000) surfaces of a hexagonal-phase NaErF4 crystal. Yellow, dark green and grey balls denote Na, Er, and F atoms, respectively.


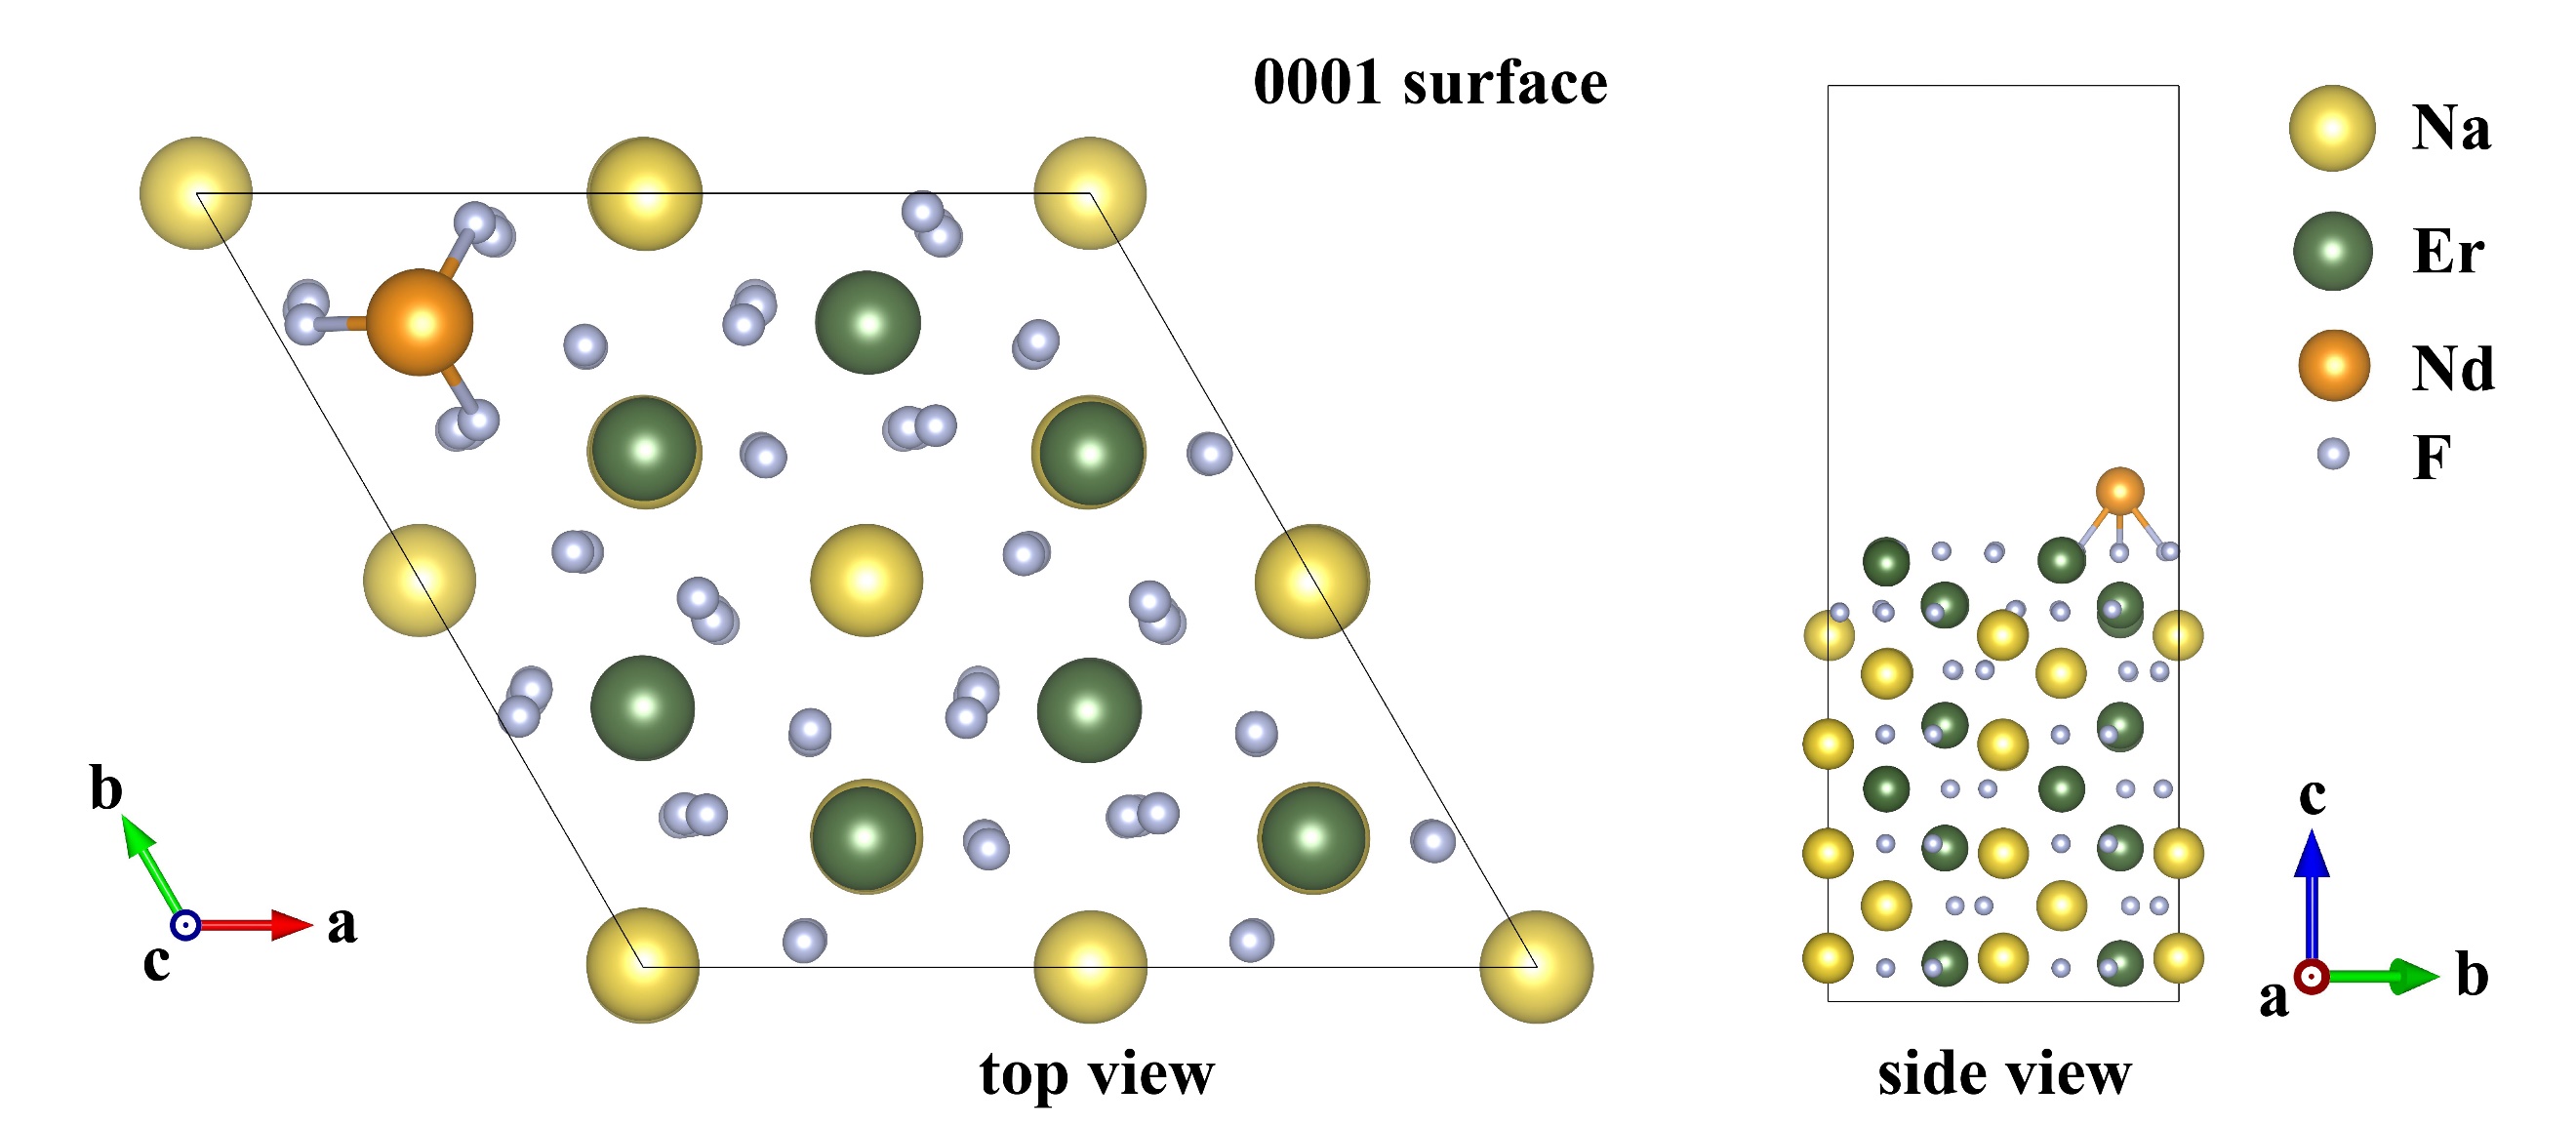


**Supplementary Figure 3.** Optimized atomic structure of a Nd atom adsorbed on the (0001) surface of the NaErF4 crystal. Yellow, dark green, orange, and grey balls denote Na, Er, Nd, and F atoms, respectively.


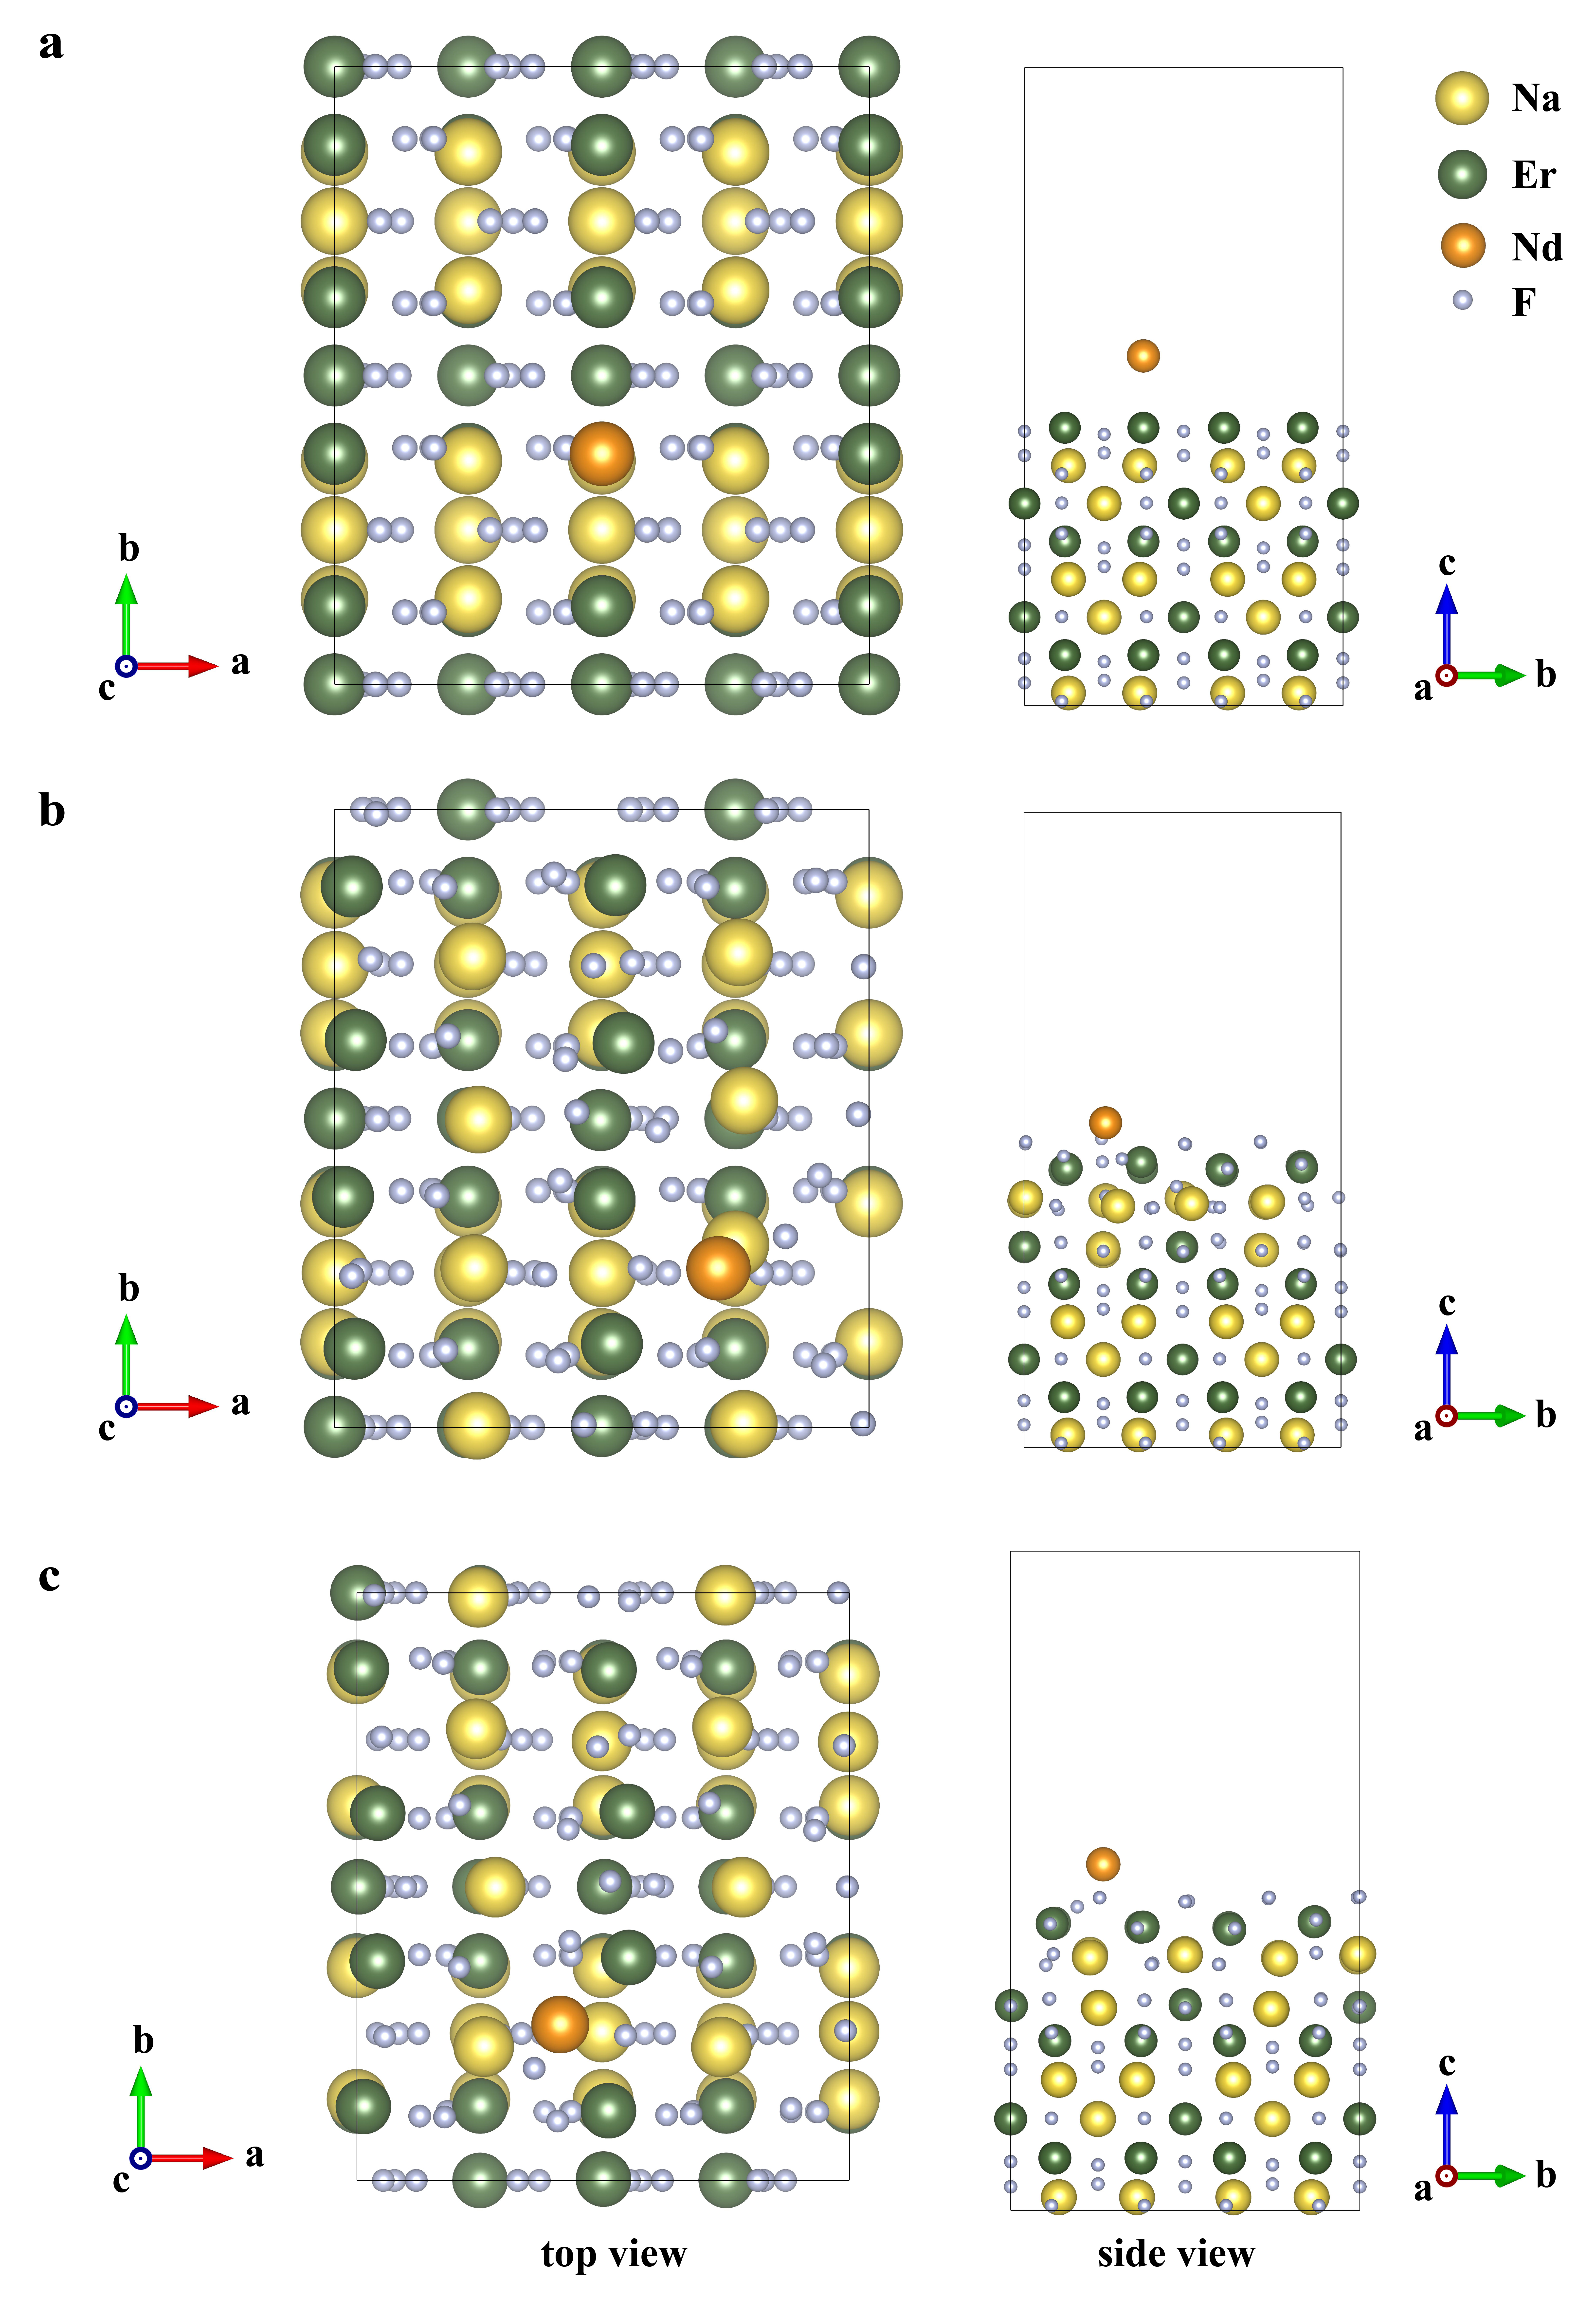


**Supplementary Figure 4.** (a) Atomic structure of a Nd atom placed on top of a surface Er atom. (b) The optimized atomic structure of the Nd atom adsorbed on the (1000) surface of the NaErF4 crystal without external strain. (c) The optimized atomic structure of the Nd atom adsorbed on the (1000) surface of the NaErF4 crystal with external strain. Yellow, dark green, orange, and grey balls denote Na, Er, Nd, and F atoms, respectively.


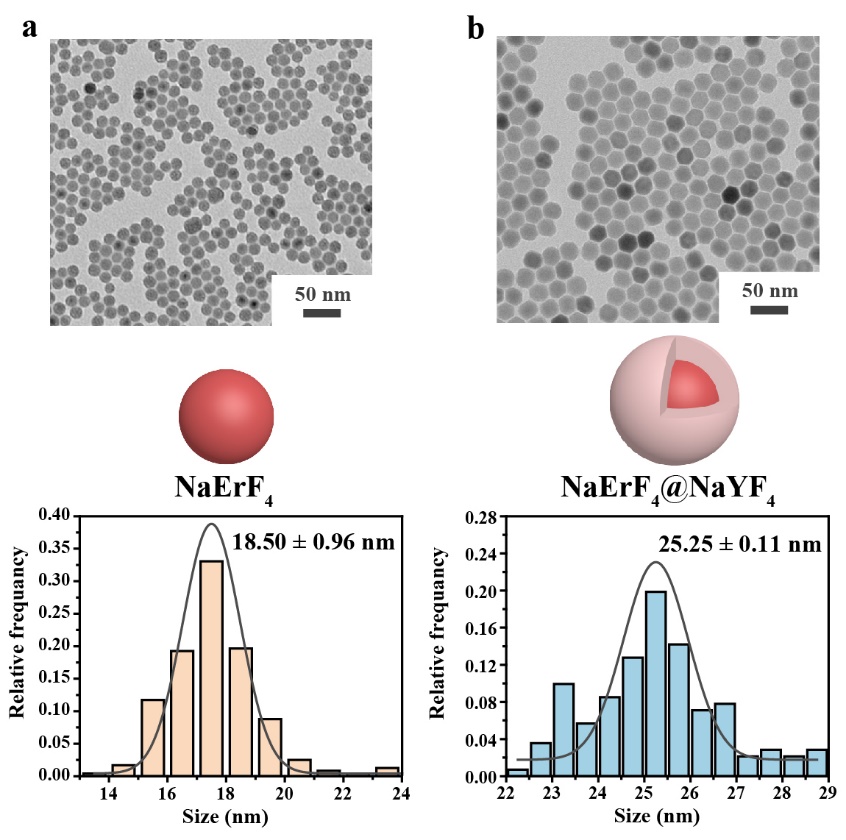


**Supplementary Figure 5.** (a,b)TEM images,schematic illustration and size distributions of NaErF4 core, NaErF4@NaYF4 (40.0 μmol/min) core-shell nanocrystals. The core has an average size of ~18.5 nm, and the Y3+-based layer has a thickness of ~3.4 nm. The size distribution is fitted by a Gaussian curve (full gray line).


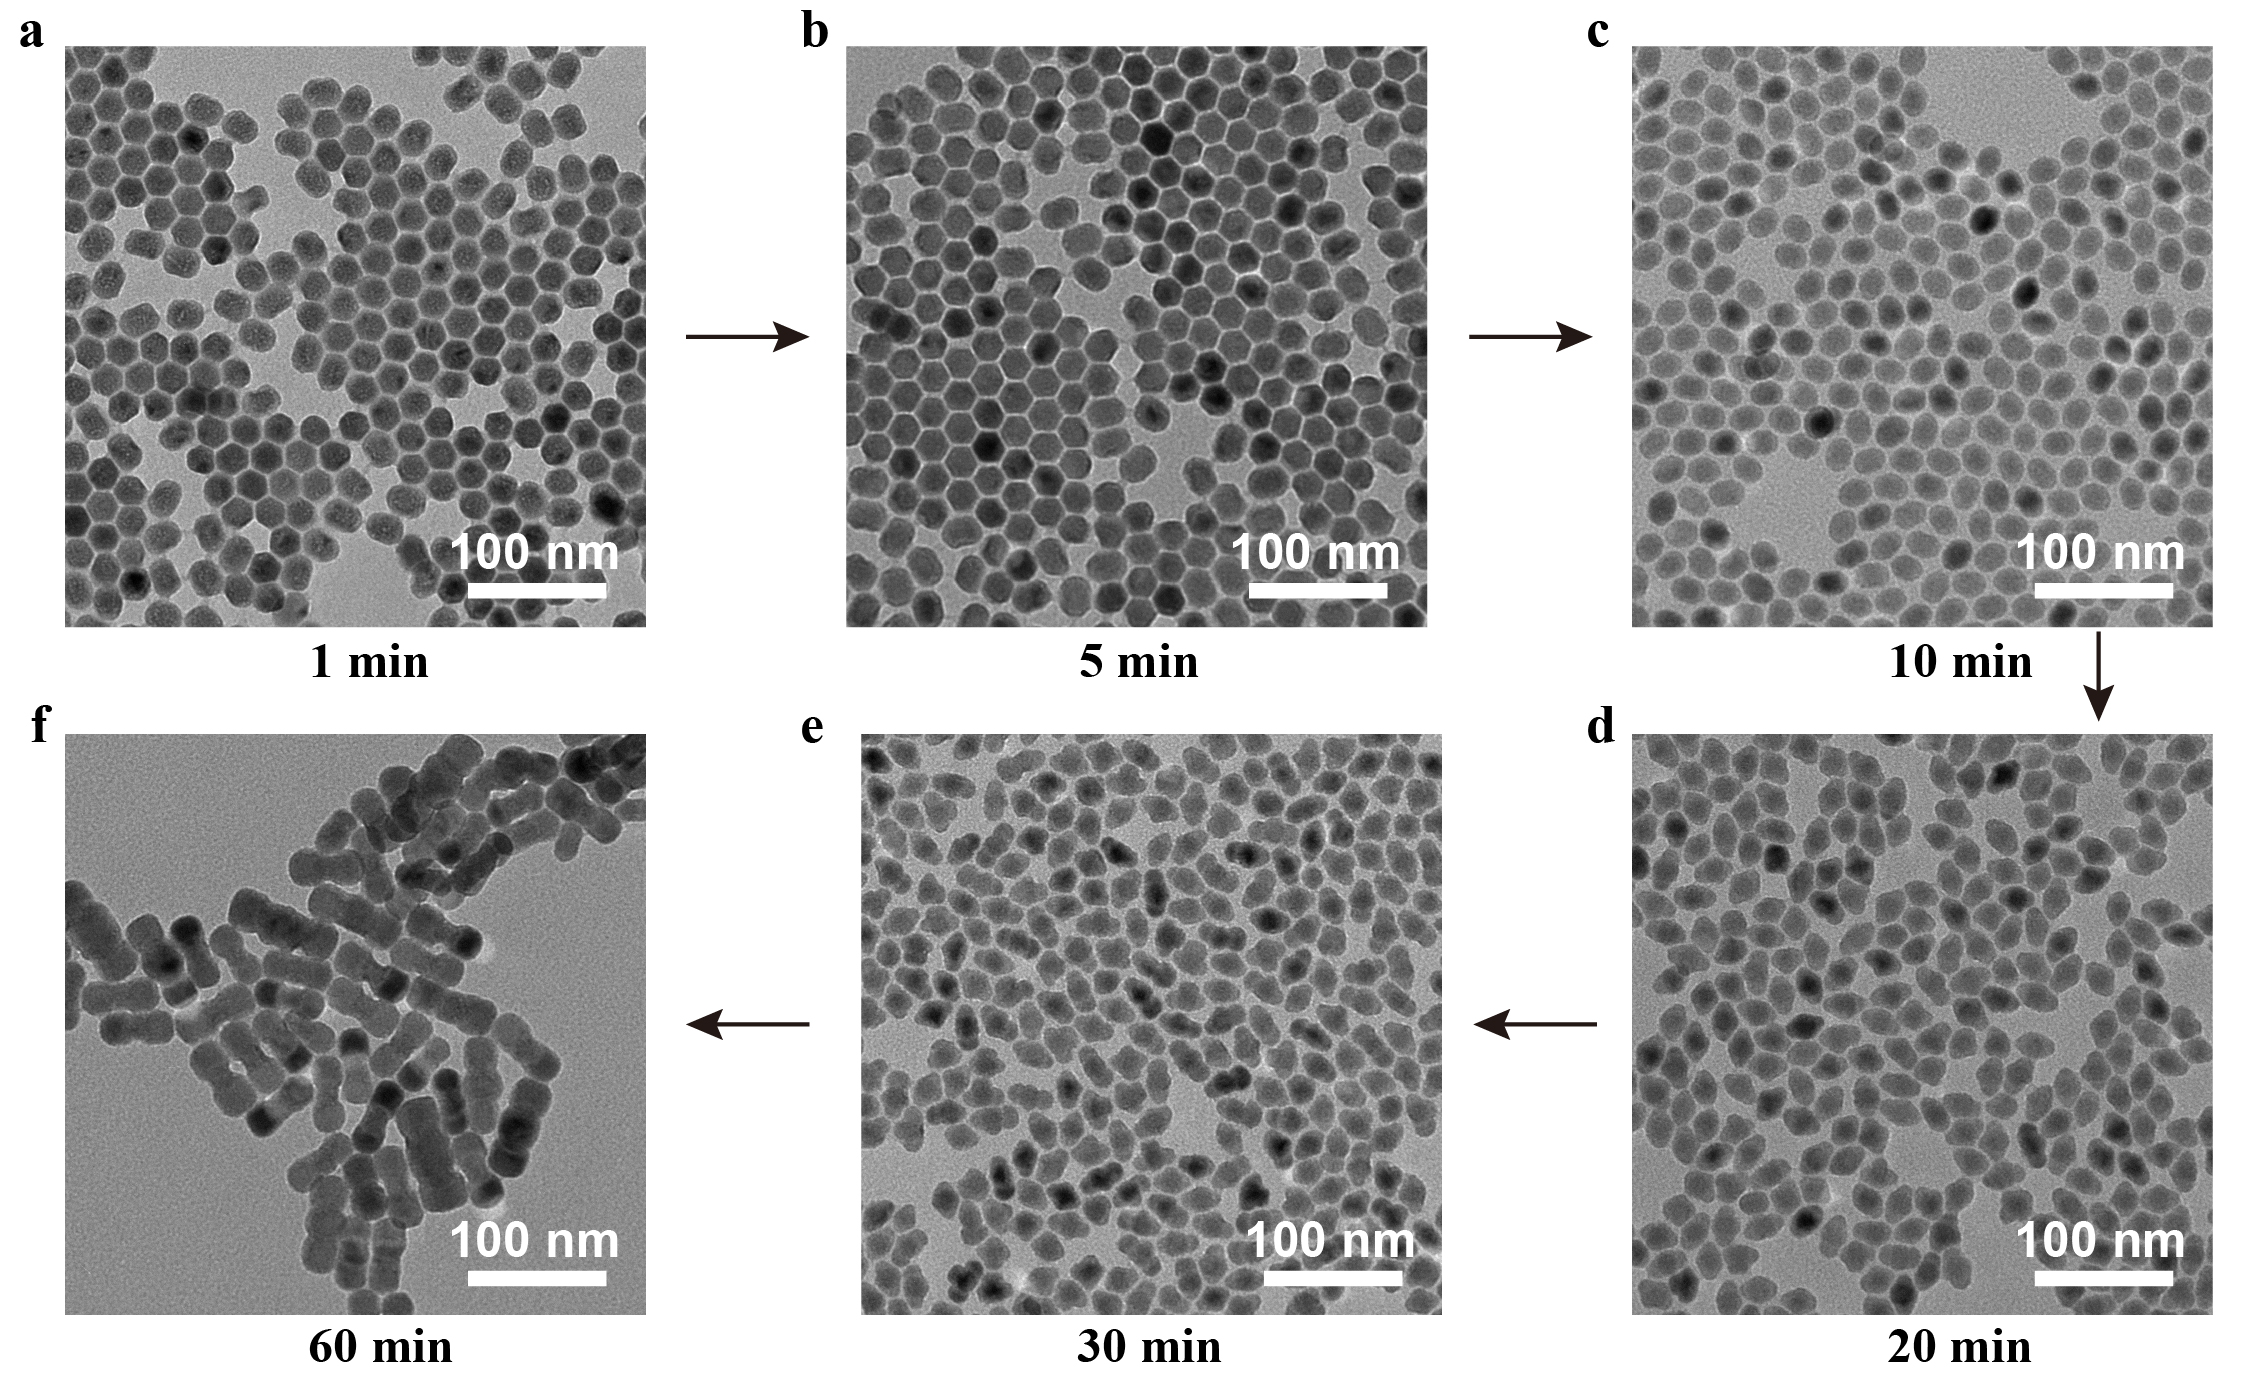


**Supplementary Figure 6.** TEM images of these as-synthesized NaErF4@NaYF4@NaNdF4 (Injection rate 6.7 μmol/min, sampling time: 1 min-60 min) nanocrystals at 1 min (a), 5 min (b), 10 min (c), 20 min (d), 30 min (e) and 60 min (f).


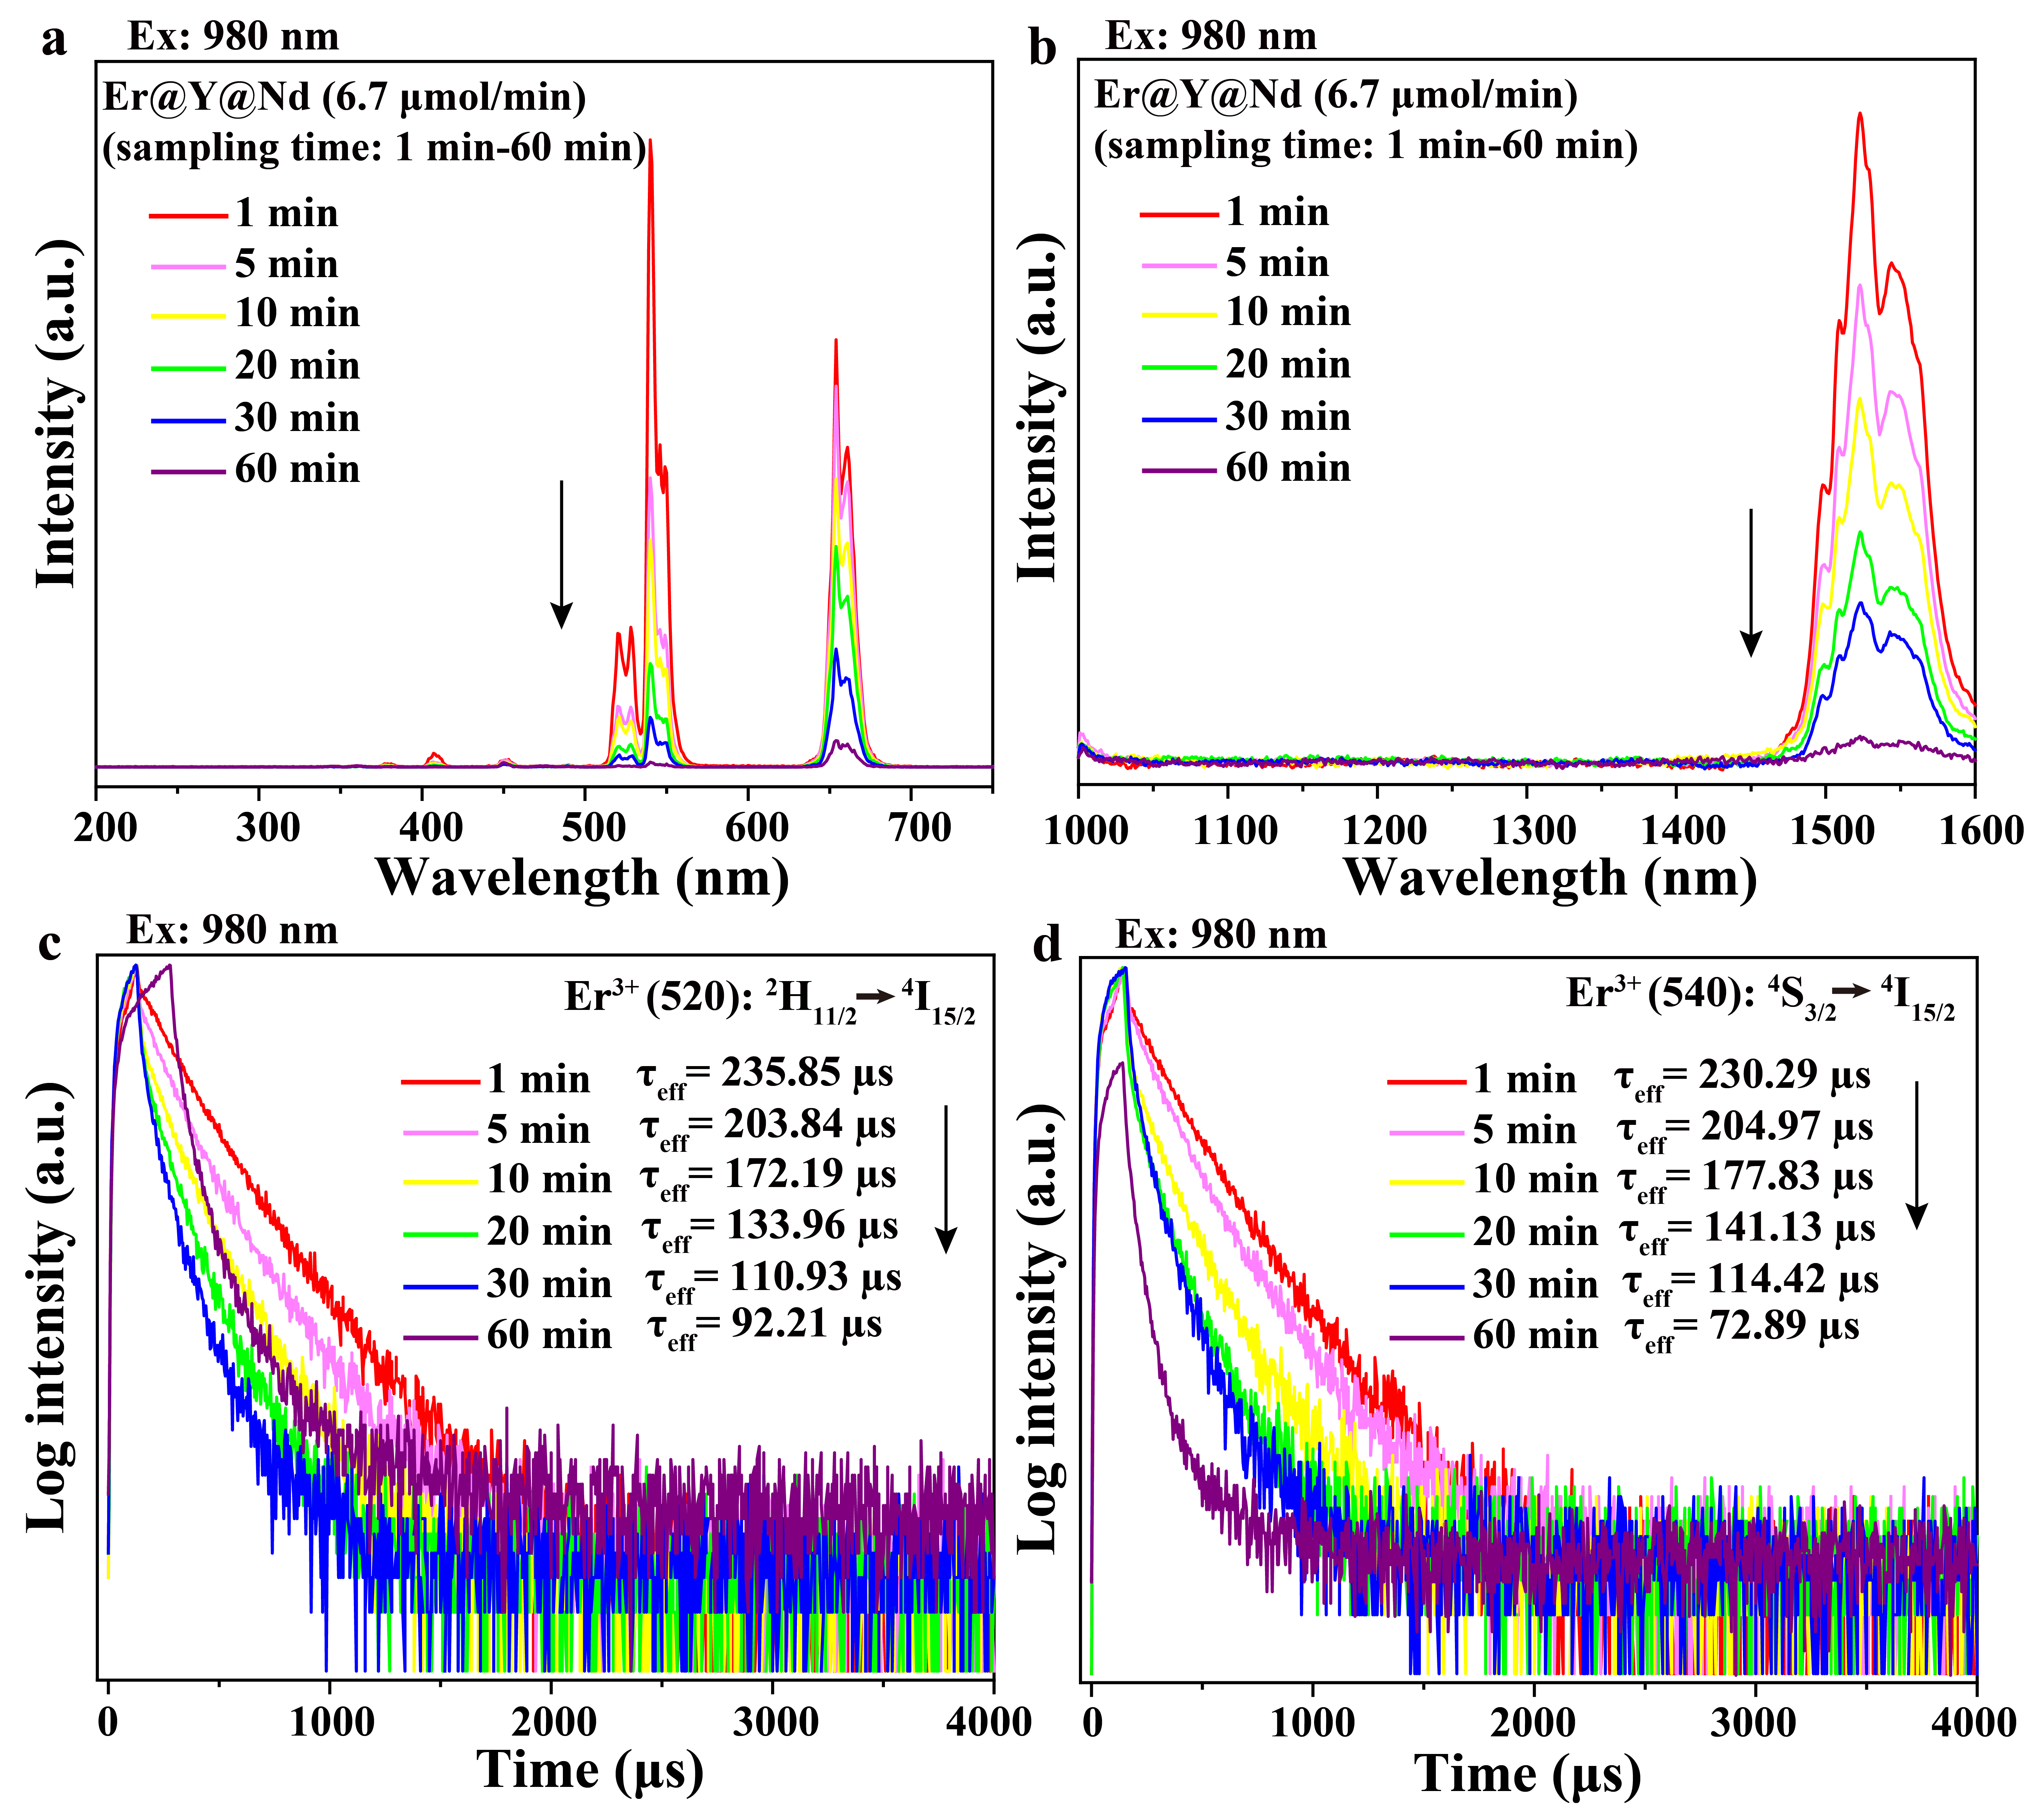


**Supplementary Figure 7.** Comparison ofupconversion (a) and downshifting (b) emission spectra, upconversion luminescence decay curves of Er3+ emissions at 520 nm (c) and 540 nm (d) of these as-synthesized NaErF4@NaYF4@NaNdF4 (6.7 μmol/min, sampling time: 1 min-60 min) nanocrystals under 980 nm excitation.

**
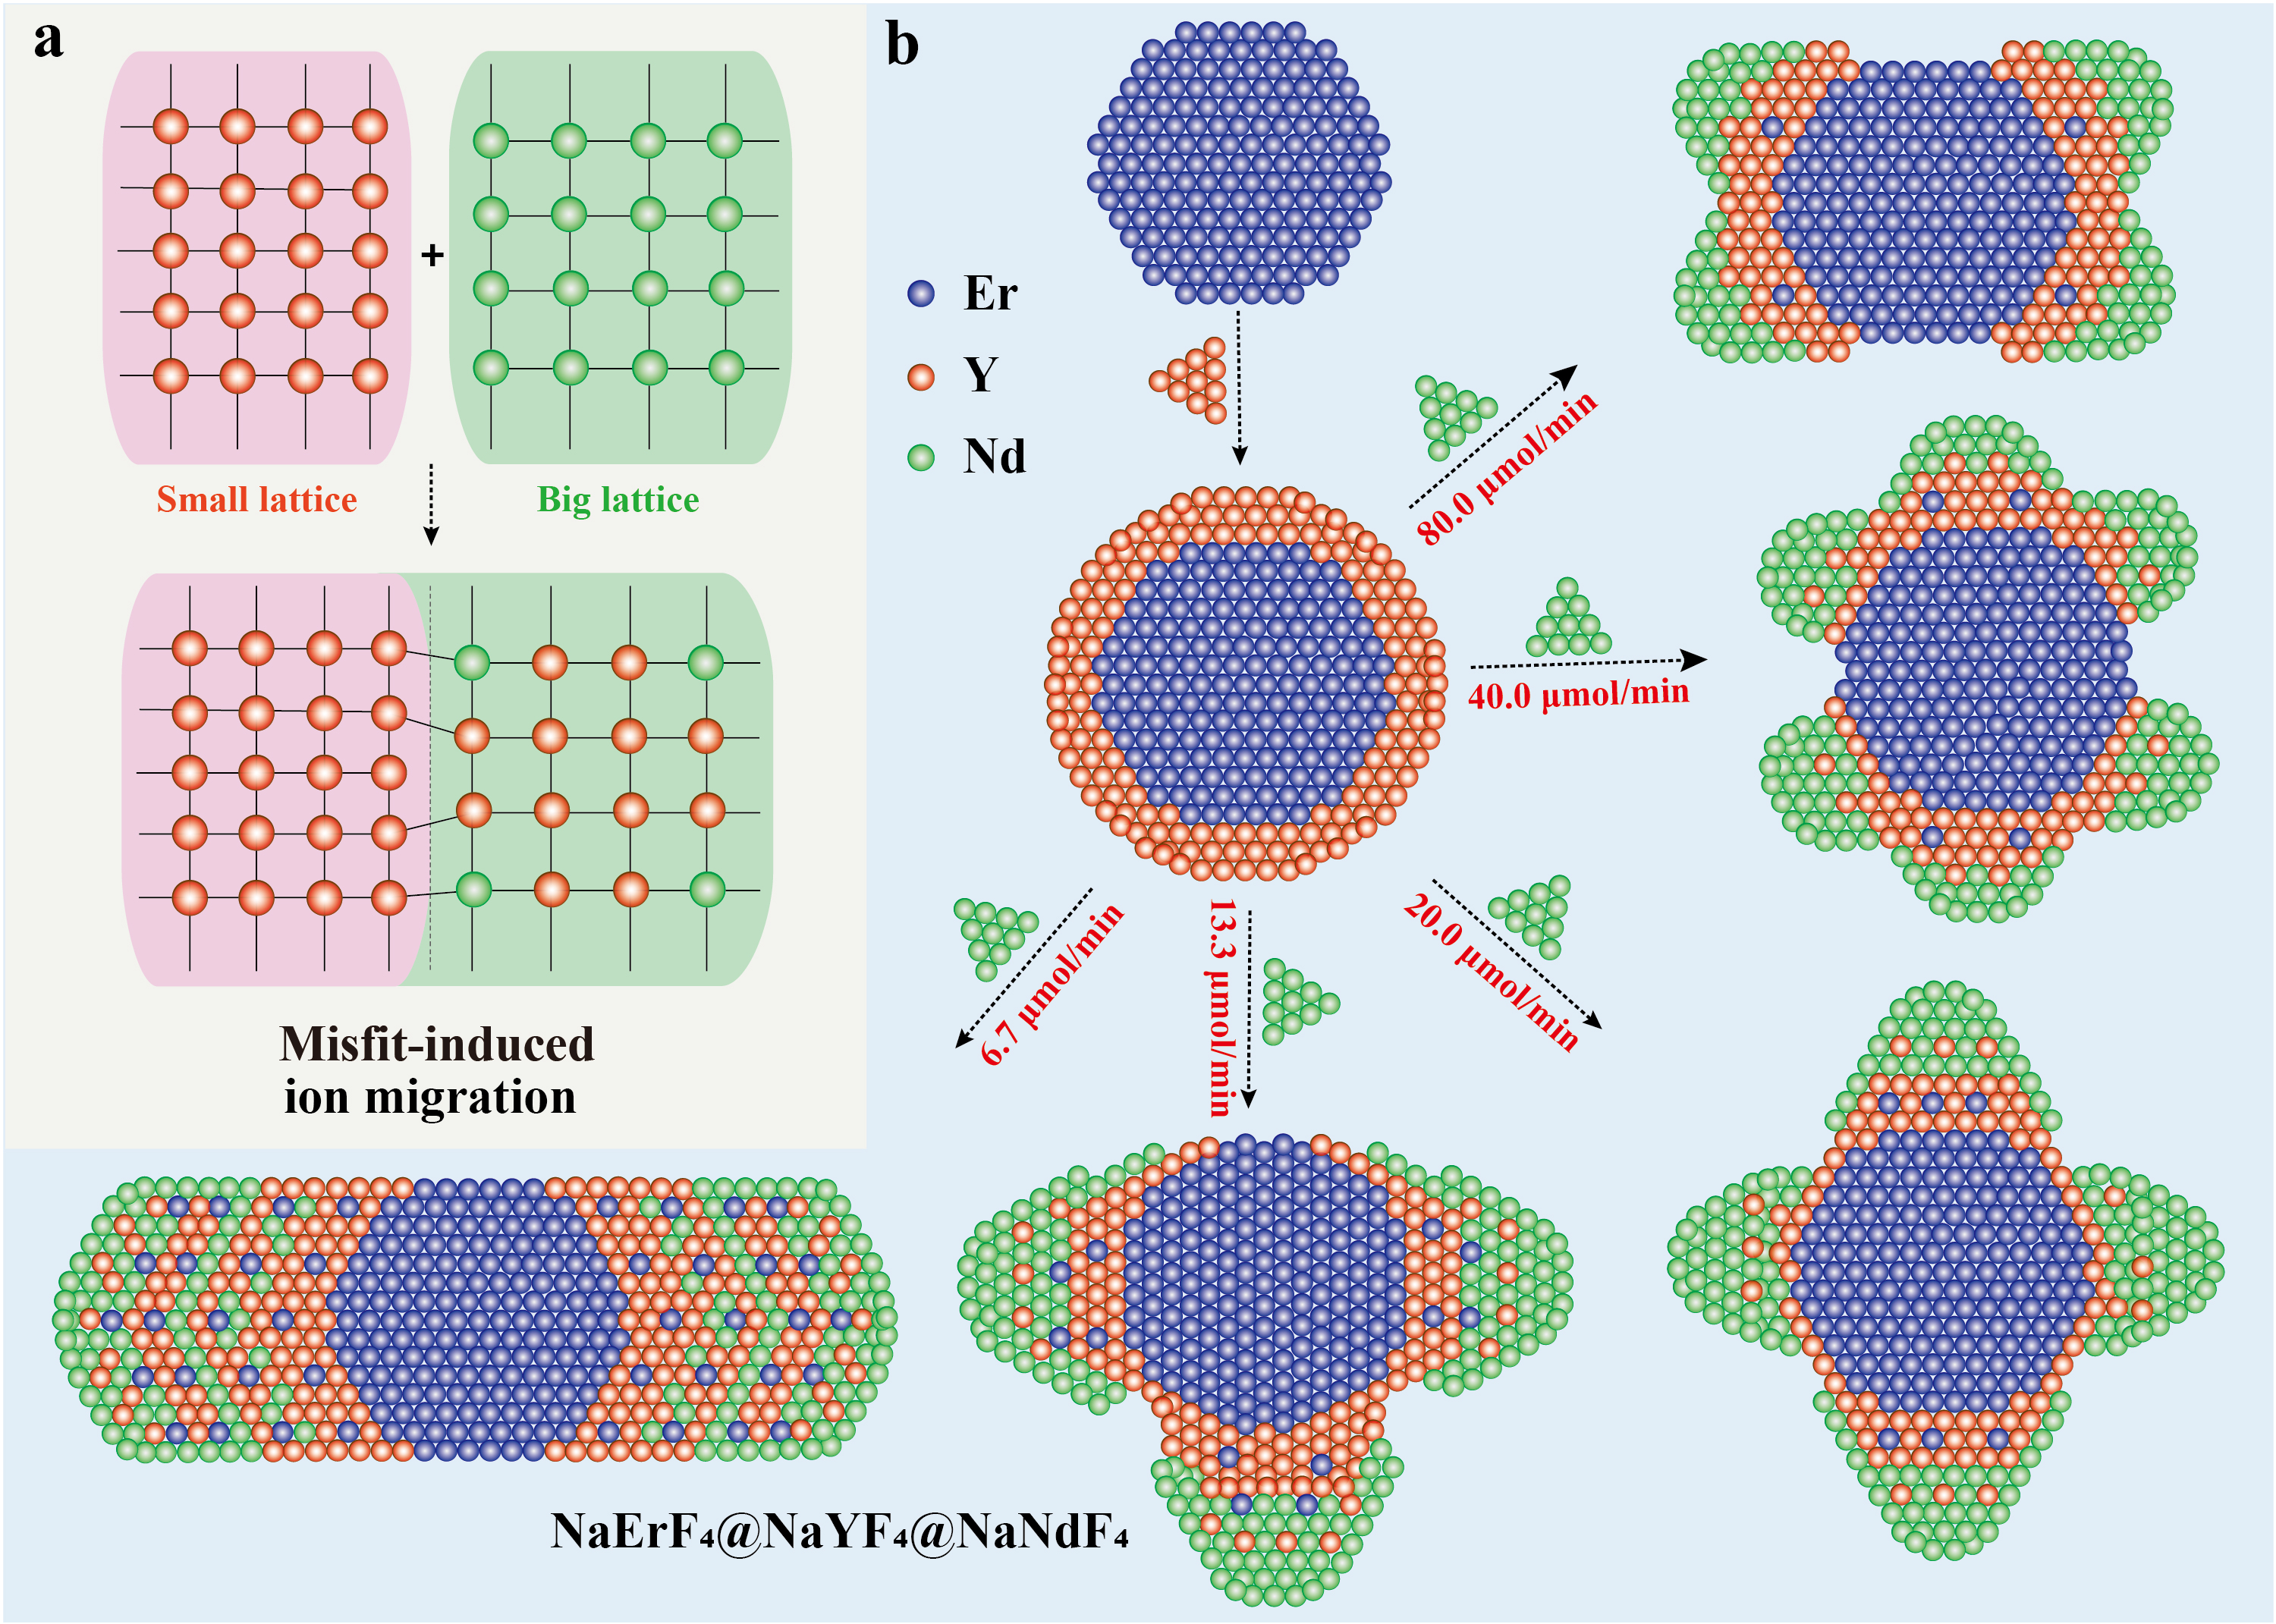
**

**Supplementary Figure 8.** Schematic illustration of misfit-induced ion migration in mismatched heteroepitaxial growth. The injection rates of the outermost Nd shell are 80.0 μmol/min, 40.0 μmol/min, 20.0 μmol/min, 13.3 μmol/min and 6.7 μmol/min, respectively (each layer contains 0.4 mmol rare earths ions). In the process of mismatched heteroepitaxial growth of NaErF4@NaYF4@NaNdF4 core-multishell structure nanocrystals, the lattice relocation of Y3+ ions induced by the lattice mismatch of Nd3+ ions leads to a large amount of ion diffusion of Y3+ ions into the Nd3+ shell. With the injection rates decreases, the lattice relocation effect gradually increased, and the lattice relocation is the most obvious when the injection rate is 6.7 μmol/min.


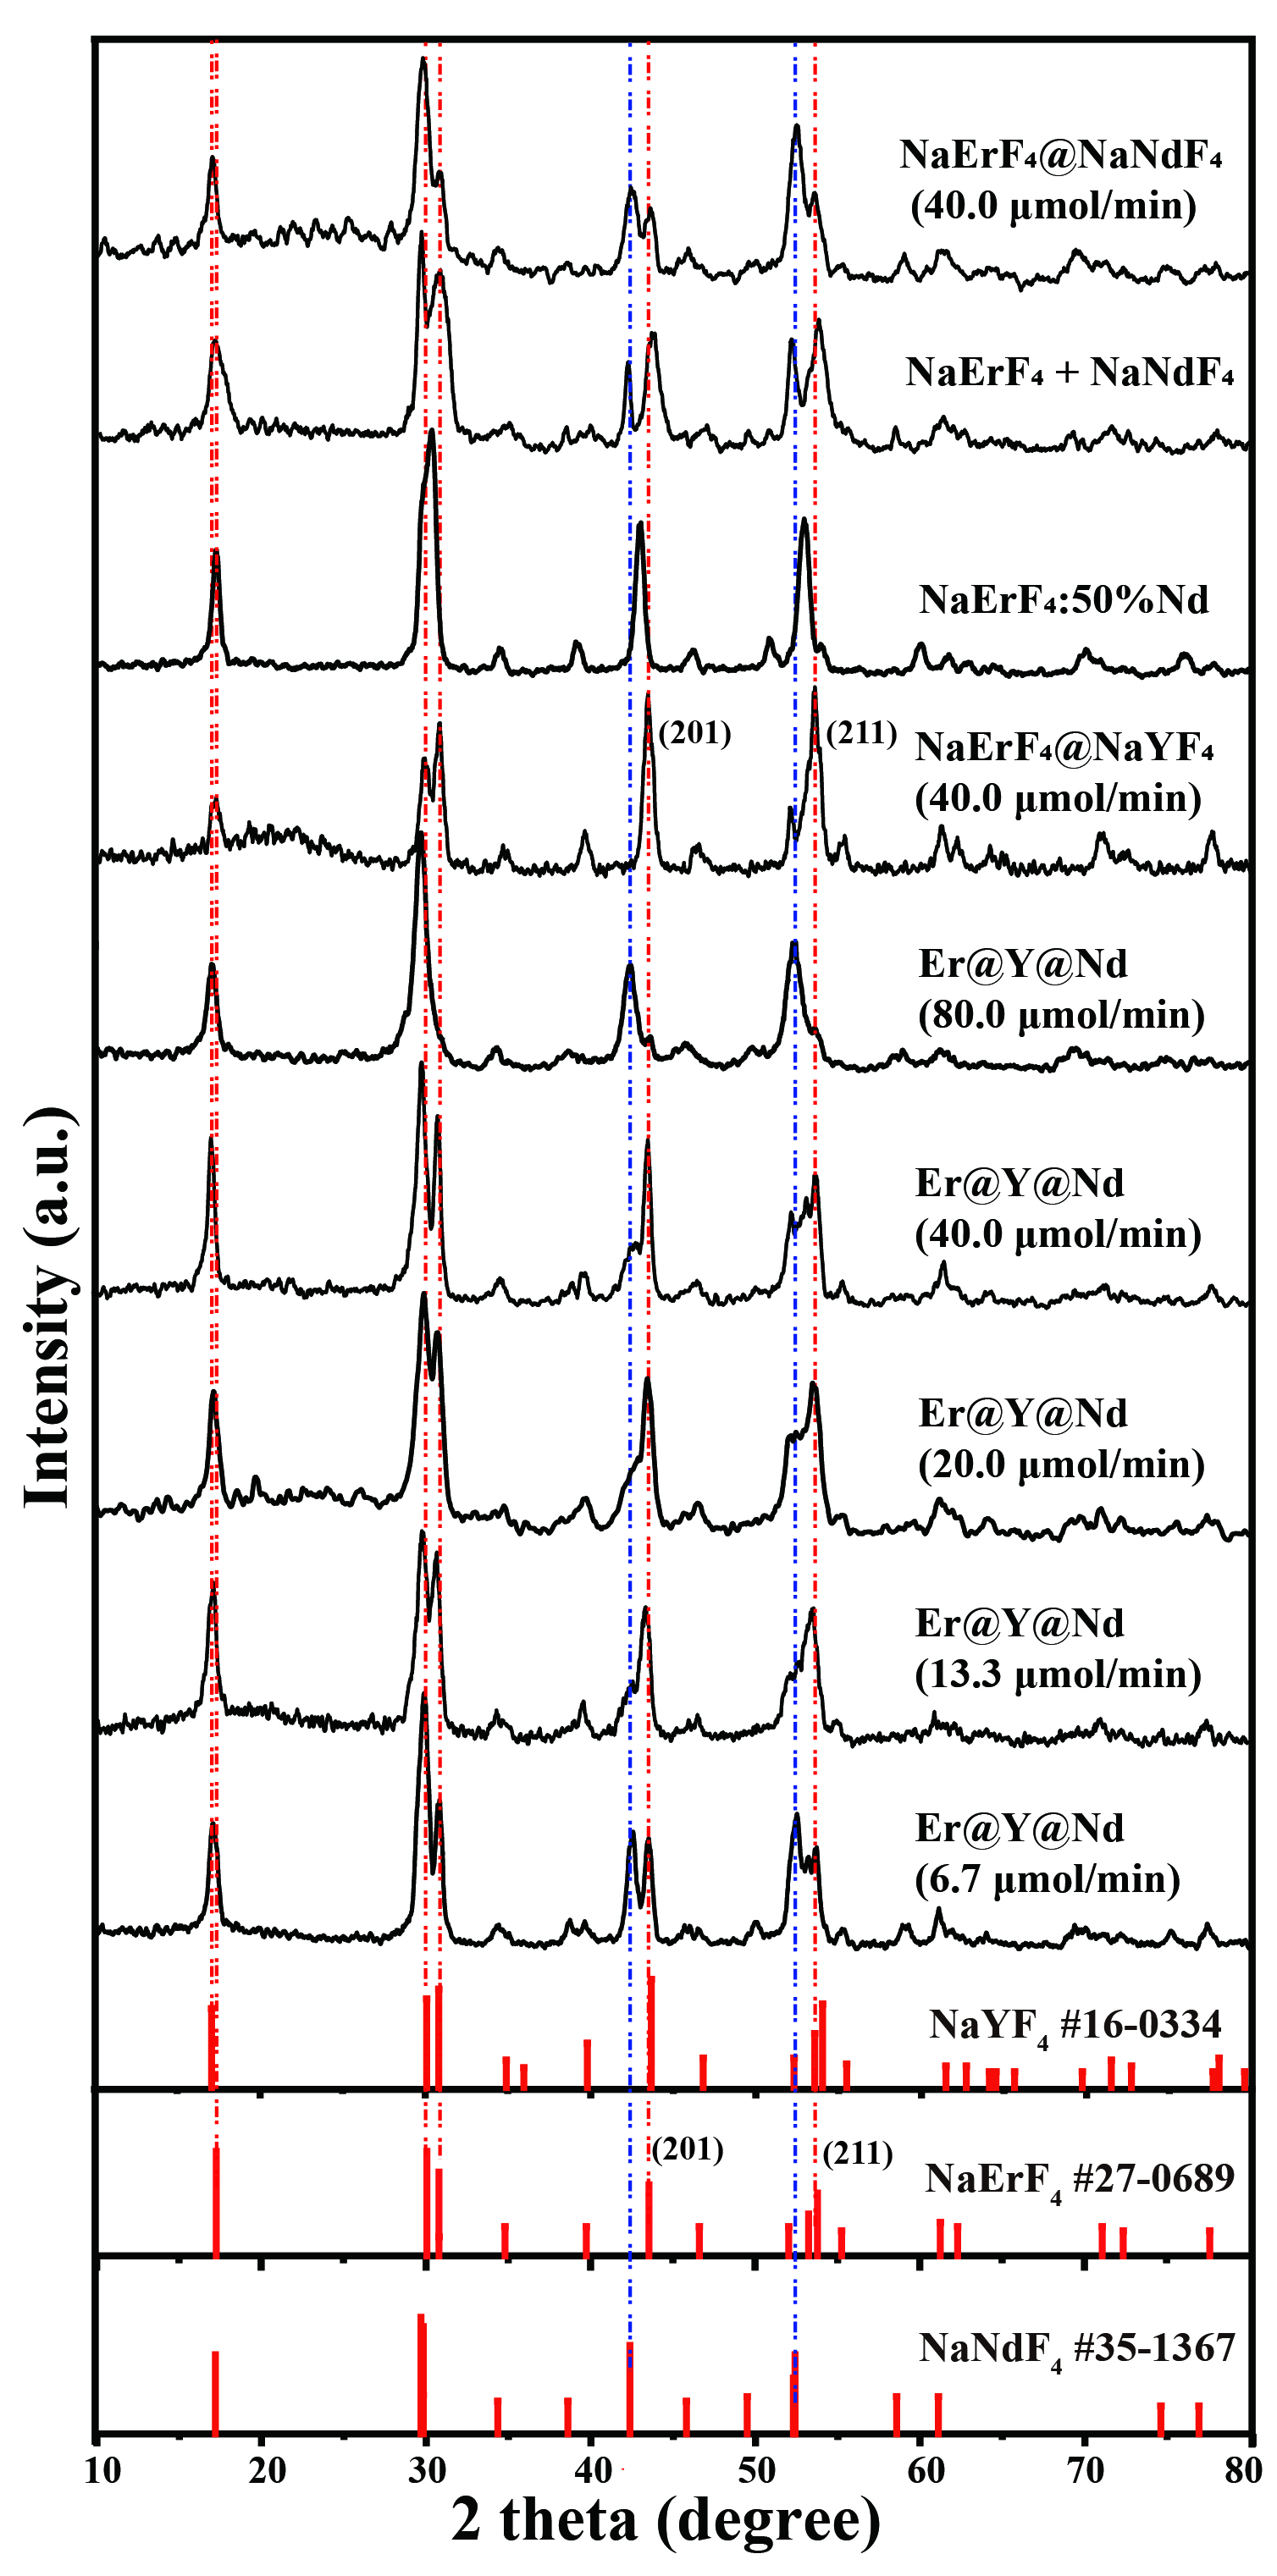


**Supplementary Figure 9.** XRD patterns of these as-synthesized NaErF4@NaNdF4 (40.0 μmol/min), NaErF4 mix with NaNdF4, NaErF4:50%Nd, NaErF4@NaYF4 (40.0 μmol/min), NaErF4@NaYF4@NaNdF4 (80.0 μmol/min, 40.0 μmol/min, 20.0 μmol/min, 13.3 μmol/min and 6.7 μmol/min) nanocrystals, indicating the hexagonal-phase of various nanocrystals.


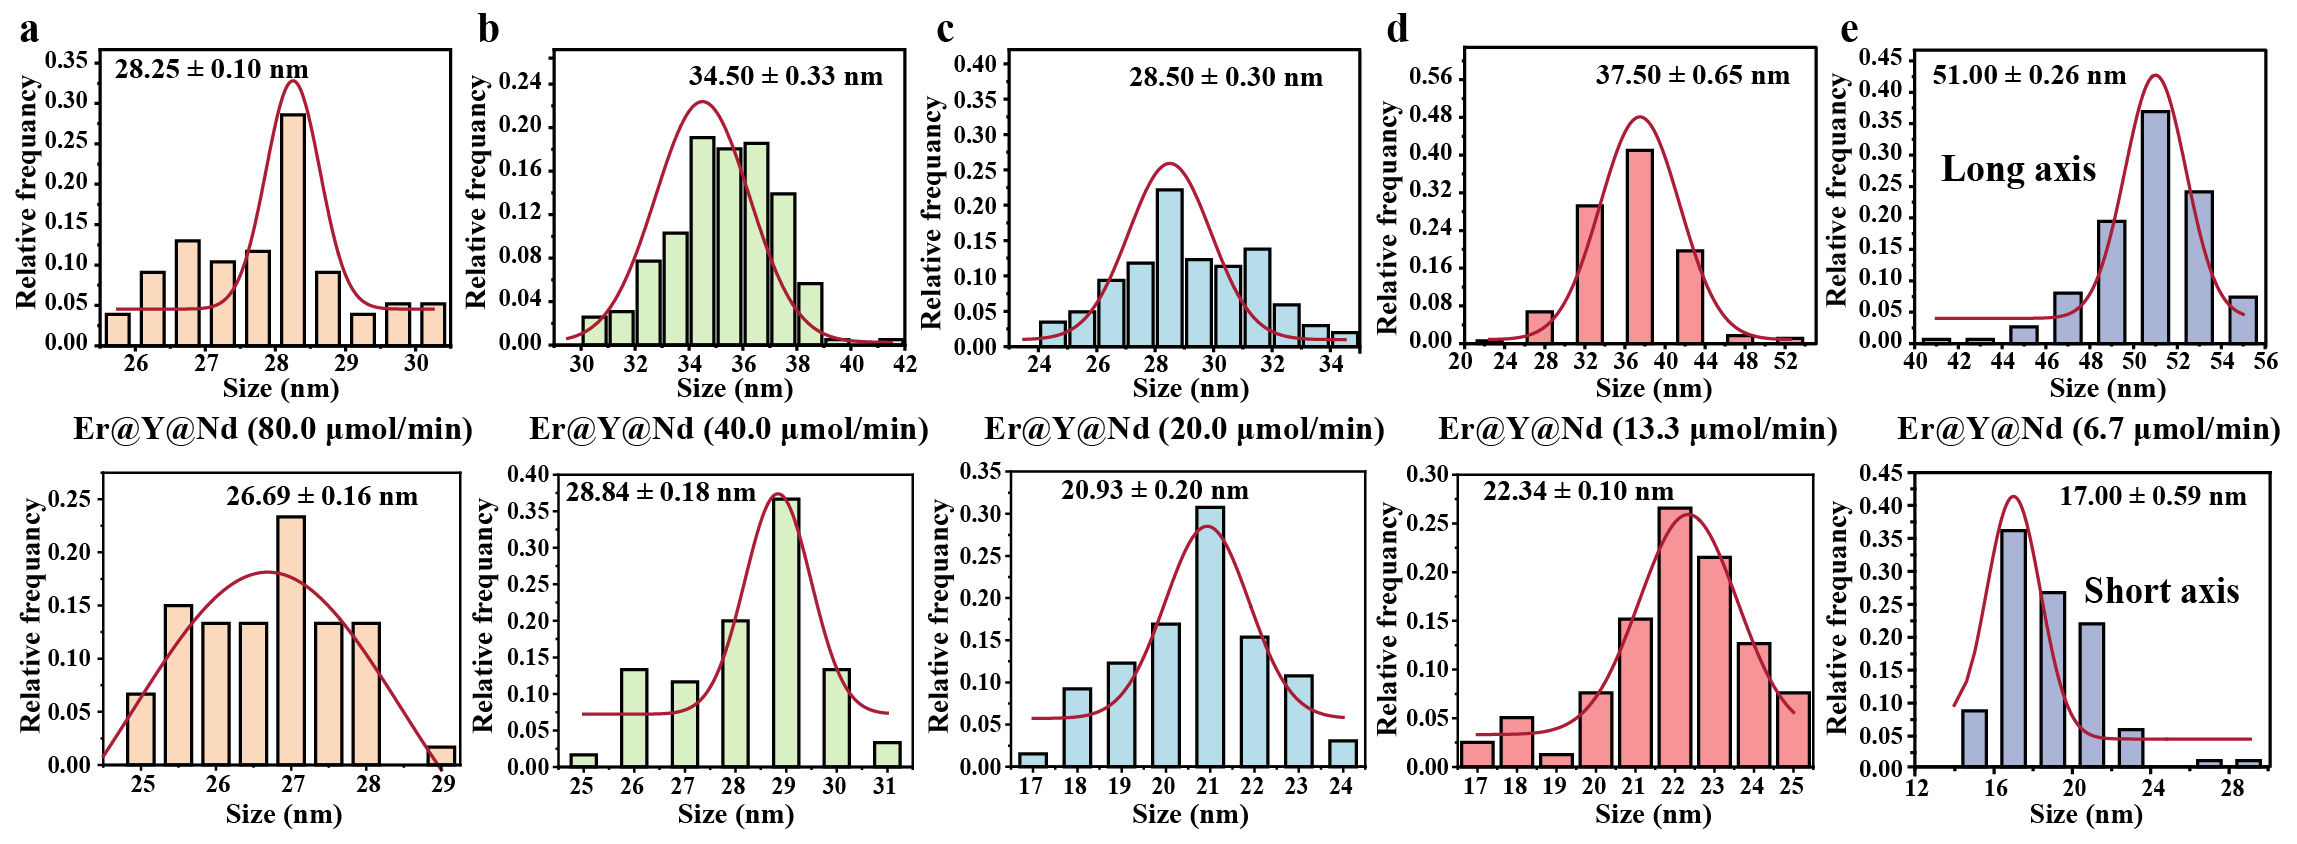


**Supplementary Figure 10.** Size distributions (long axis and short axis) of these as-synthesized NaErF4@NaYF4@NaNdF4 nanocrystals with corresponding injection rates about 80.0 μmol/min (a), 40.0 μmol/min (b), 20.0 μmol/min (c), 13.3 μmol/min (d), 6.7 μmol/min (e). The size distribution is fitted by a Gaussian curve (full red line).


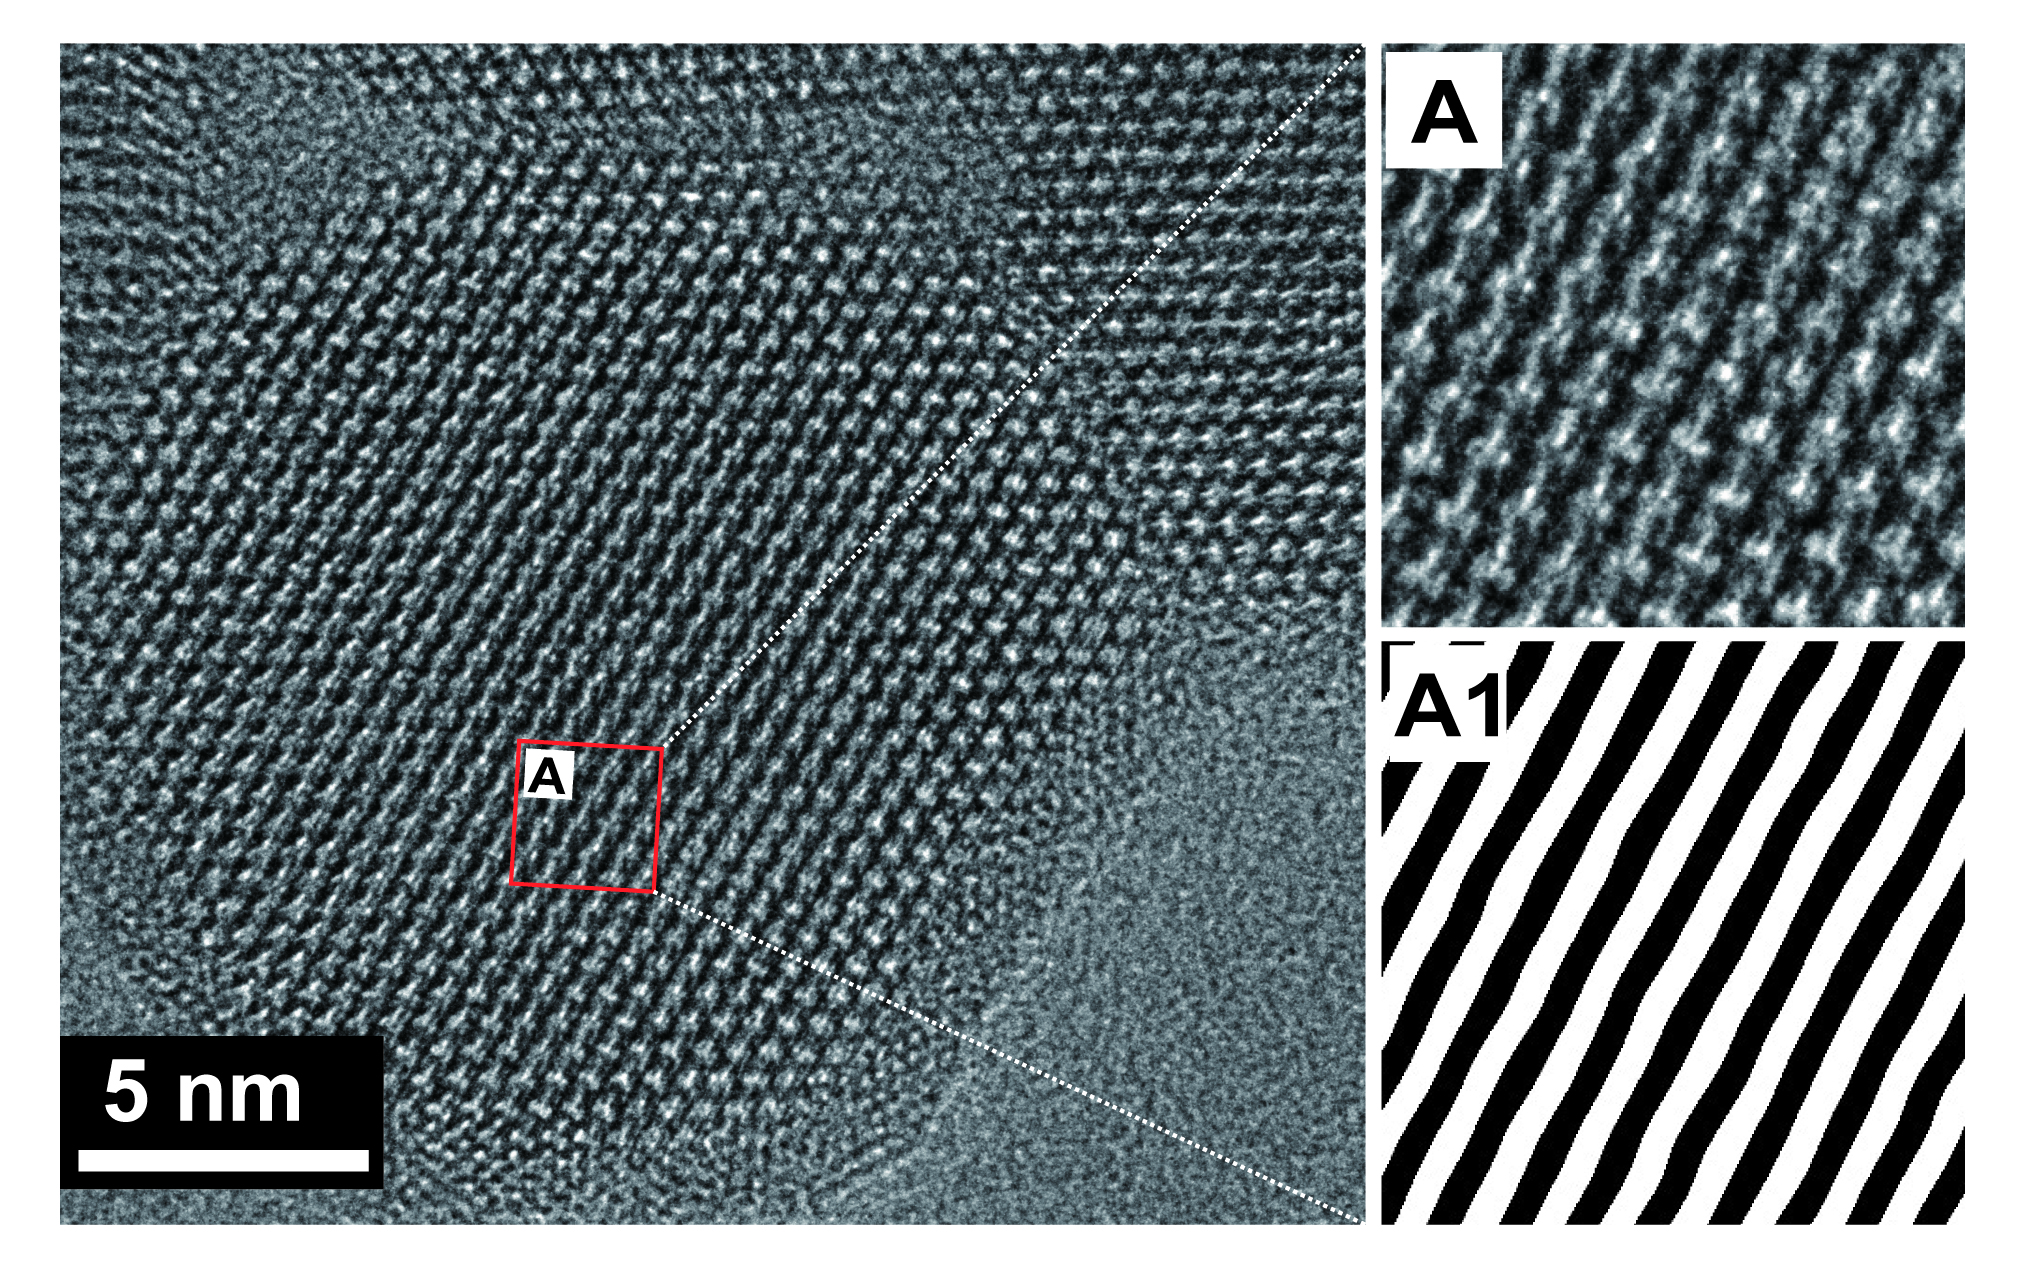


**Supplementary Figure 11.** HRTEM and IFFTpatterns of NaErF4@NaYF4 nanocrystals.


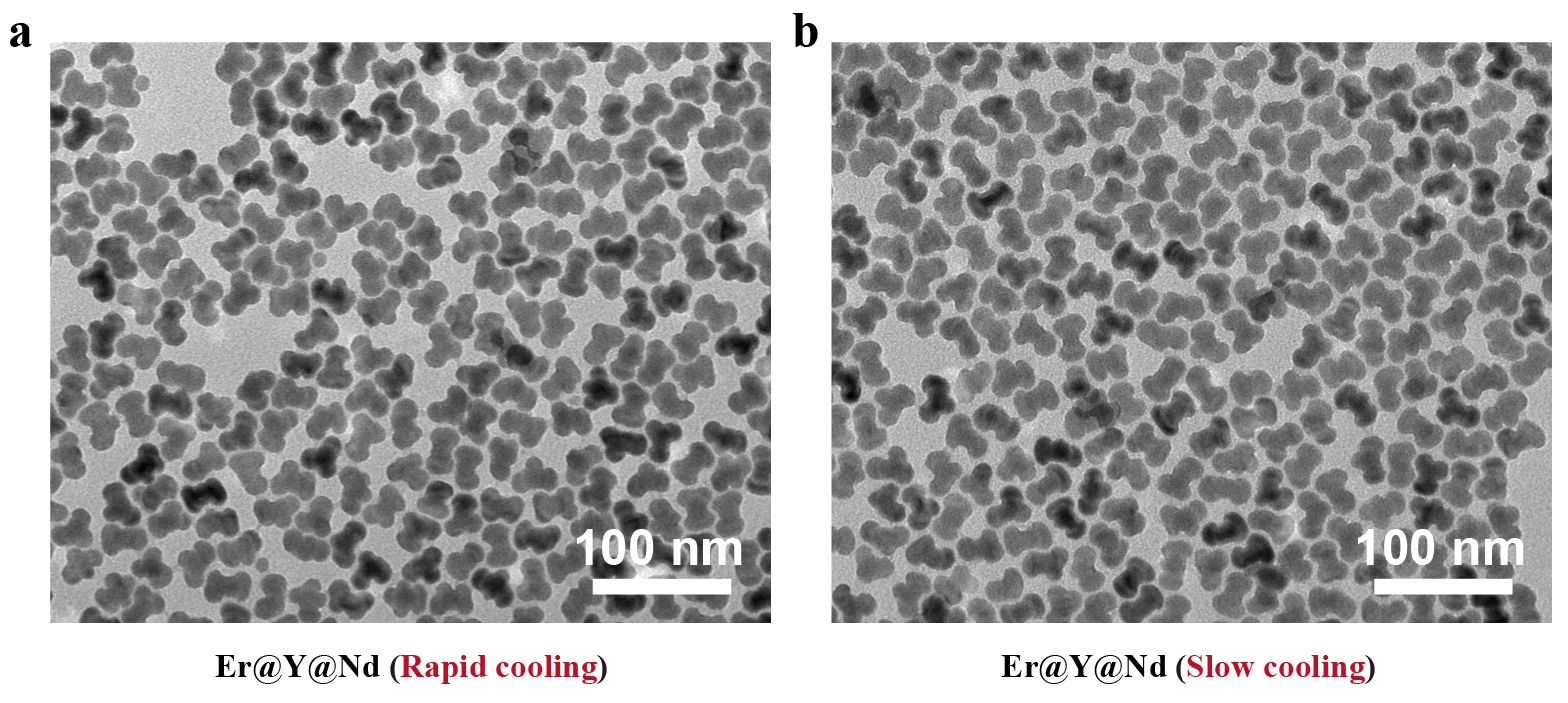


**Supplementary Figure 12.** TEM images of rapid cooling (a) and slow cooling (b) of the as-synthesized NaErF4@NaYF4@NaNdF4 (400 μmol/min) nanocrystals.


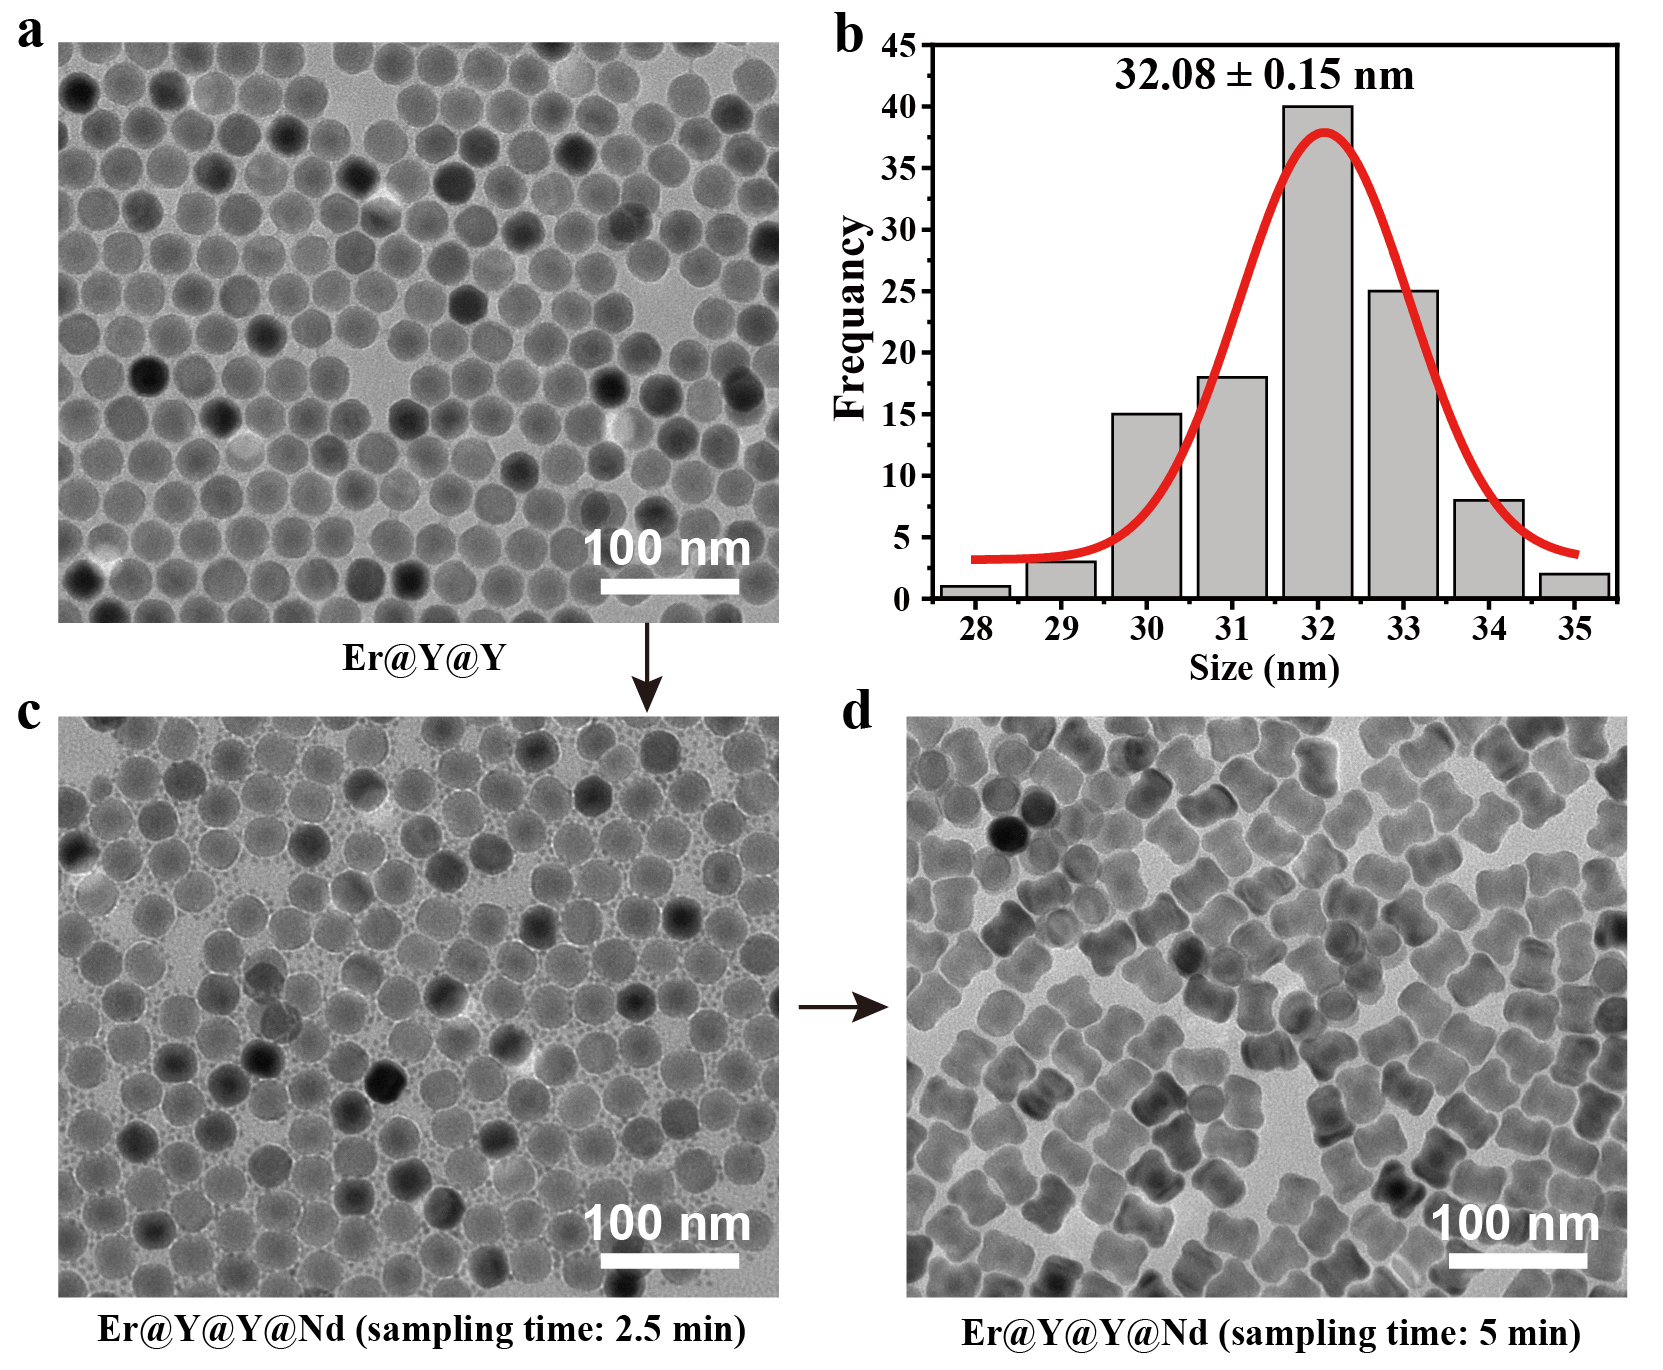


**Supplementary Figure 13.** TEM image (a) and size distributions (b) of the as-synthesized NaErF4@NaYF4@NaYF4 (the thickness of two layer of Y = 6.8 nm) nanocrystals. TEM images of these as-synthesized NaErF4@NaYF4@NaYF4@NaNdF4 (80.0 μmol/min, the thickness of two layer of Y = 6.8 nm) nanocrystals at 2.5 min (c) and 5 min (d).


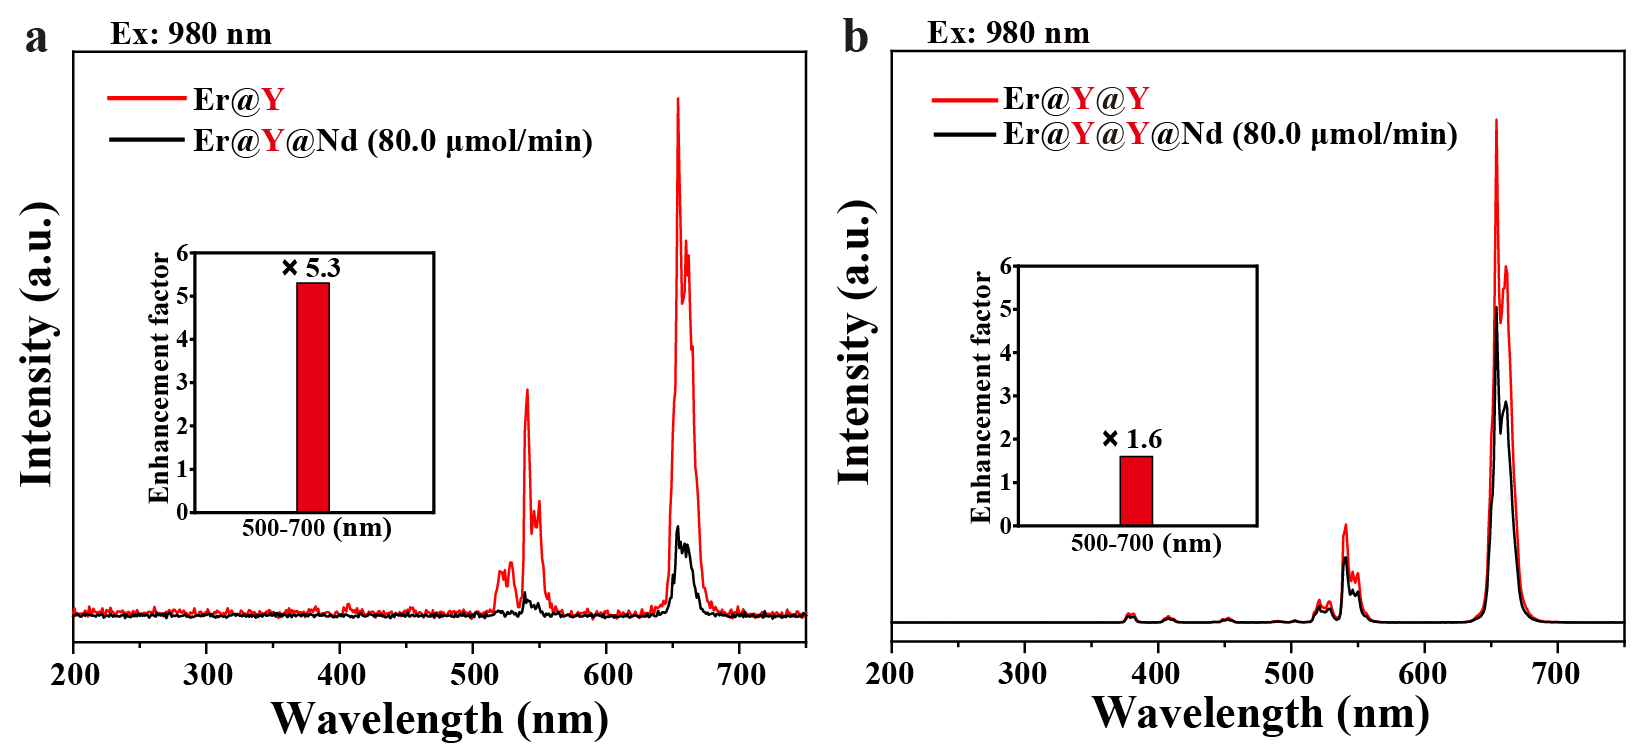


**Supplementary Figure 14.** (a) Comparison ofupconversion emission spectra of these as-synthesized NaErF4@NaYF4 (the thickness of one layer of Y = 3.4 nm) and NaErF4@NaYF4@NaNdF4 (80.0 μmol/min) nanocrystals, (b) Comparison of upconversion emission spectra of these as-synthesized NaErF4@NaYF4@NaYF4 (the thickness of two layer of Y = 6.8 nm) and NaErF4@NaYF4@NaYF4@NaNdF4 (80.0 μmol/min) nanocrystals under 980 nm excitation. Enhancement factor of the luminescence of NaErF4@NaYF4 and NaErF4@NaYF4@NaYF4 nanocrystals at 500-700 nm compared to the NaErF4@NaYF4@NaNdF4 (80.0 μmol/min) and NaErF4@NaYF4@NaYF4@NaNdF4 (80.0 μmol/min) (Inset).

**
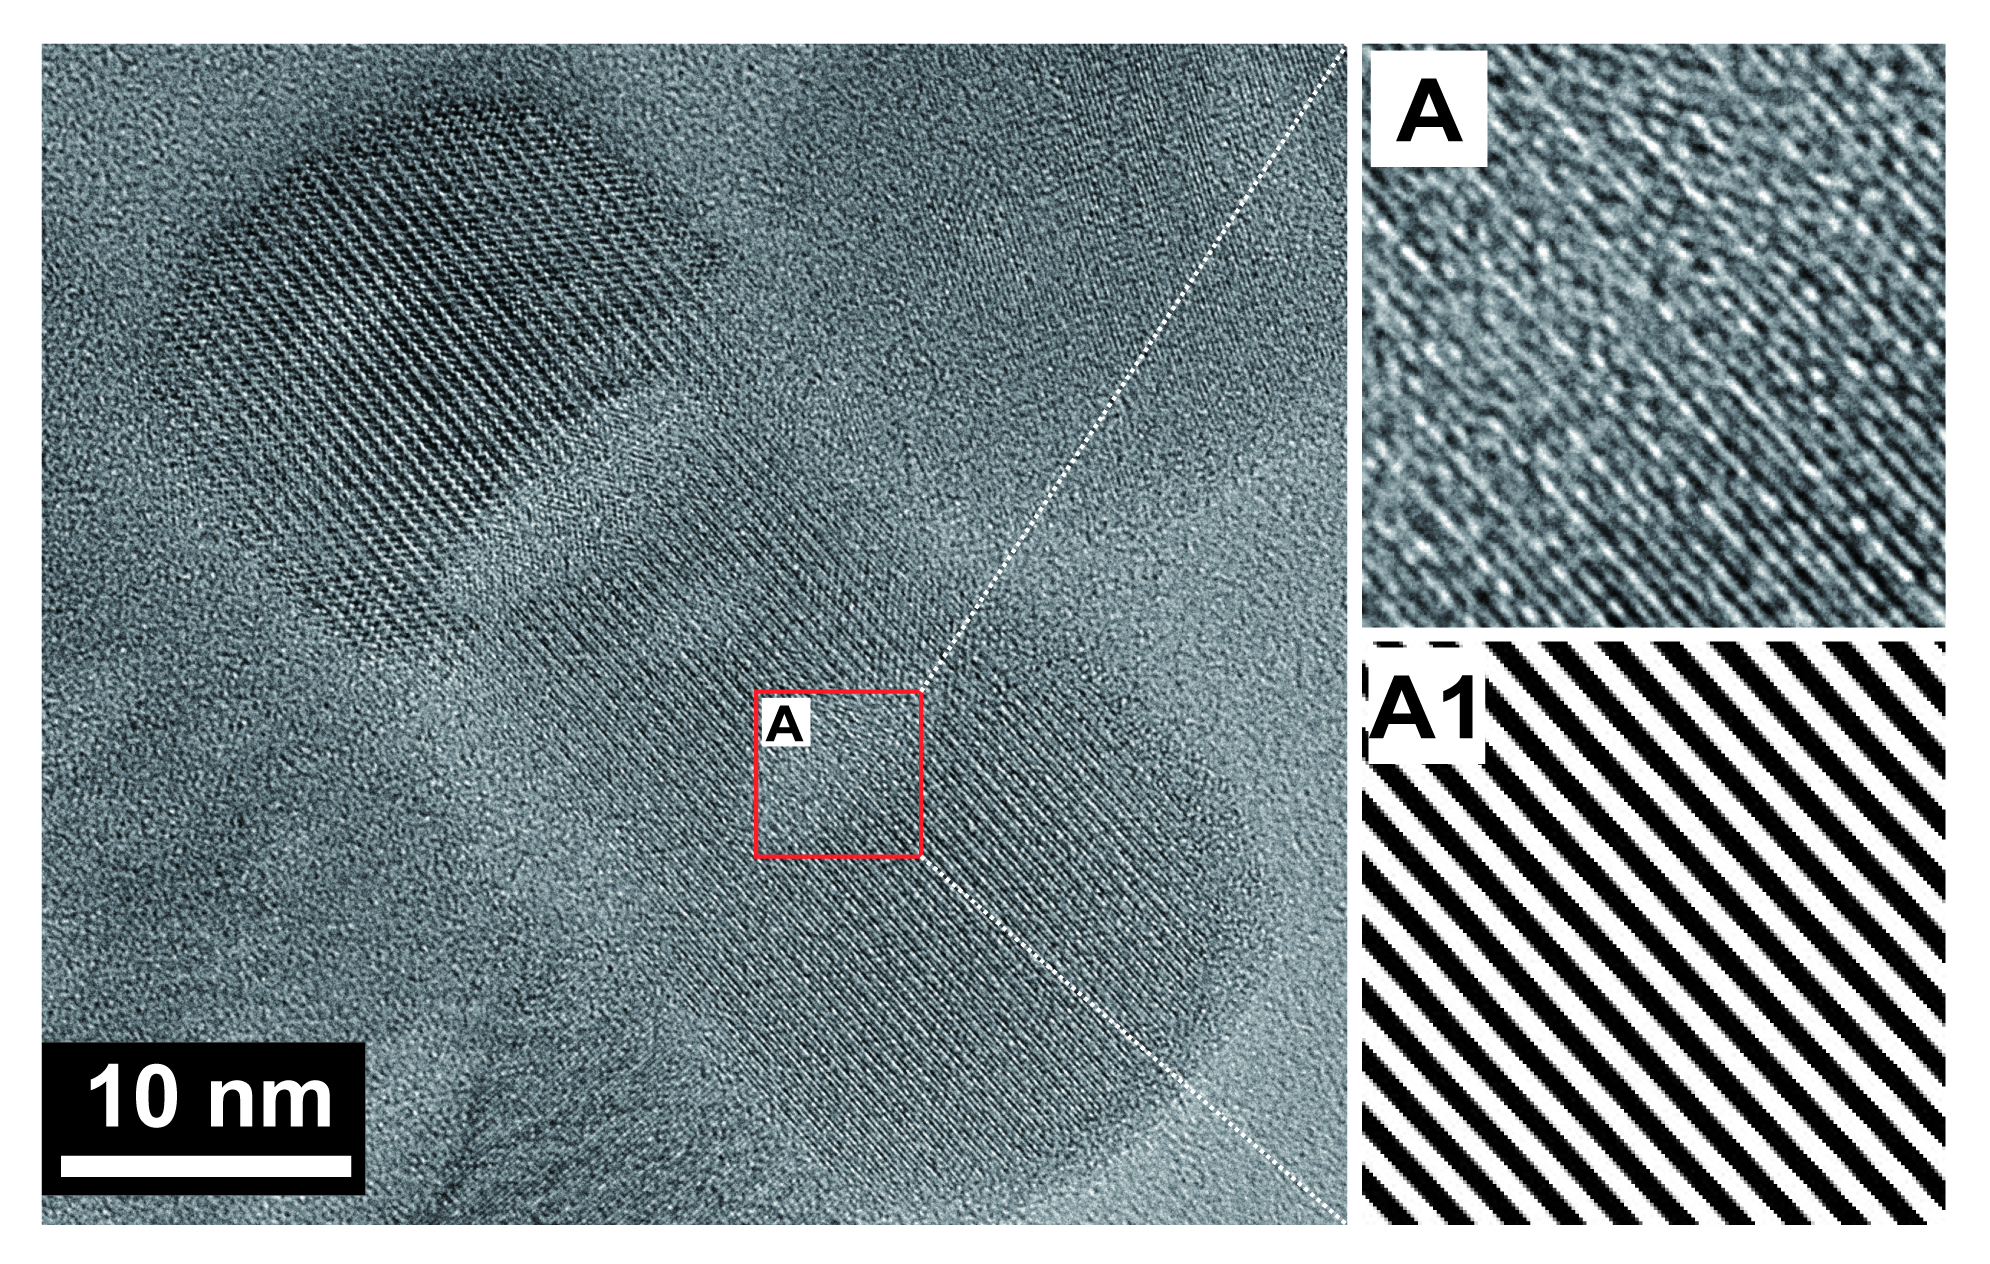
**

**Supplementary Figure 15.** HRTEM and IFFTpatterns of rod NaErF4@NaYF4@NaNdF4 (6.7 μmol/min) nanocrystals.





**Supplementary Figure 16.** EDX elemental line scan analysis of these as-synthesized NaErF4@NaYF4@NaNdF4 nanocrystals with corresponding injection rates about 80.0 μmol/min (a), 40.0 μmol/min (b), 20.0 μmol/min (c), 13.3 μmol/min (d).

**
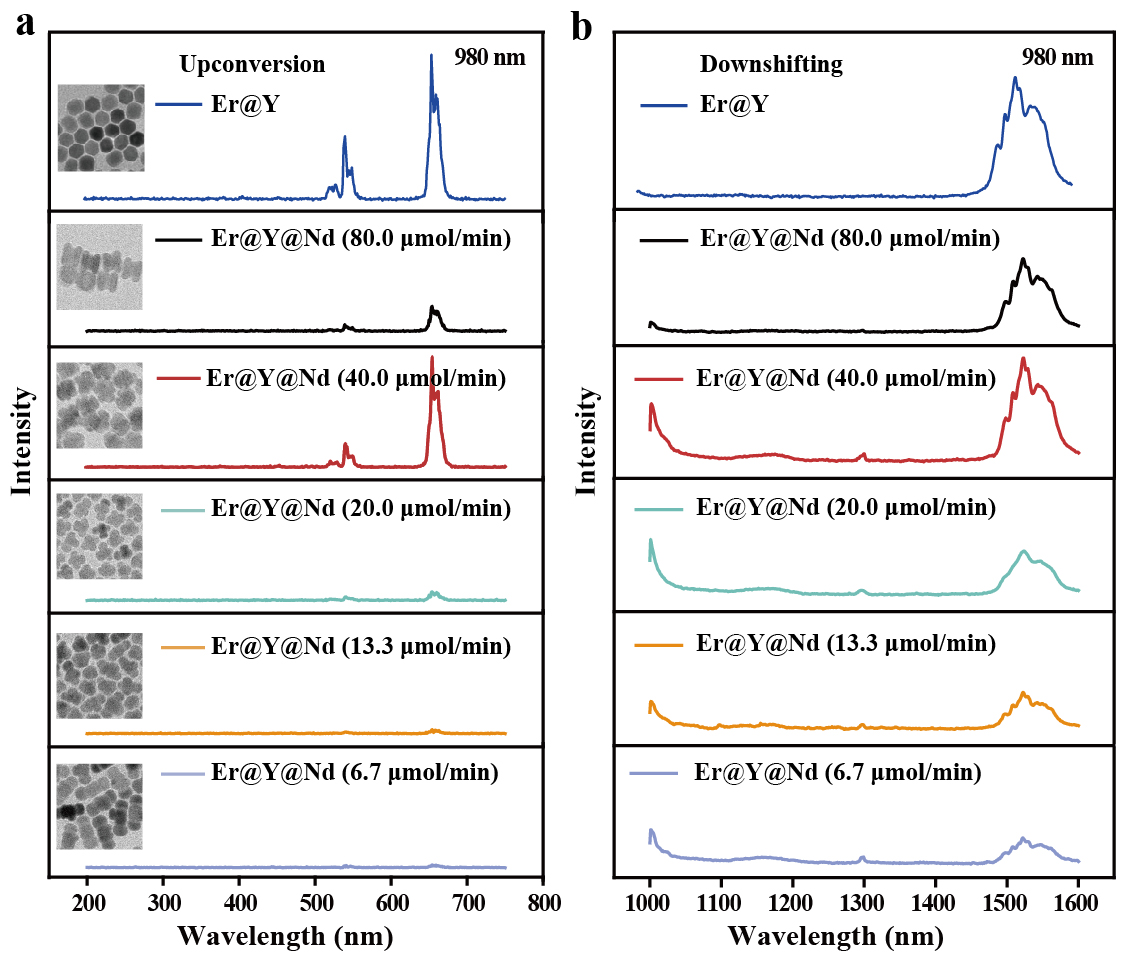
**

**Supplementary Figure 17.** Upconversion (a) and downshifting (b) emission spectra of these as-synthesized NaErF4@NaYF4 and NaErF4@NaYF4@NaNdF4 (injection rates of 80.0 μmol/min, 40.0 μmol/min, 20.0 μmol/min, 13.3 μmol/min and 6.7 μmol/min) nanocrystals under 980 nm excitation.


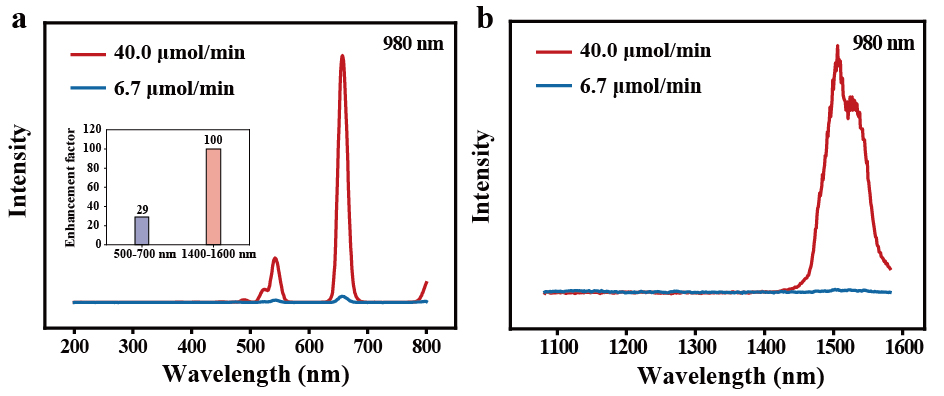


**Supplementary Figure 18.** Upconversion (a) and downshifting (b) emission spectra of NaErF4@NaYF4@NaNdF4 (injection rates of 40.0 μmol/min and 6.7 μmol/min) nanocrystals under 980 nm excitation. Enhancement factor of the luminescence of 40.0 μmol/min at 500-700 nm, 1400-1600 nm compared to the 6.7 μmol/min (inset).


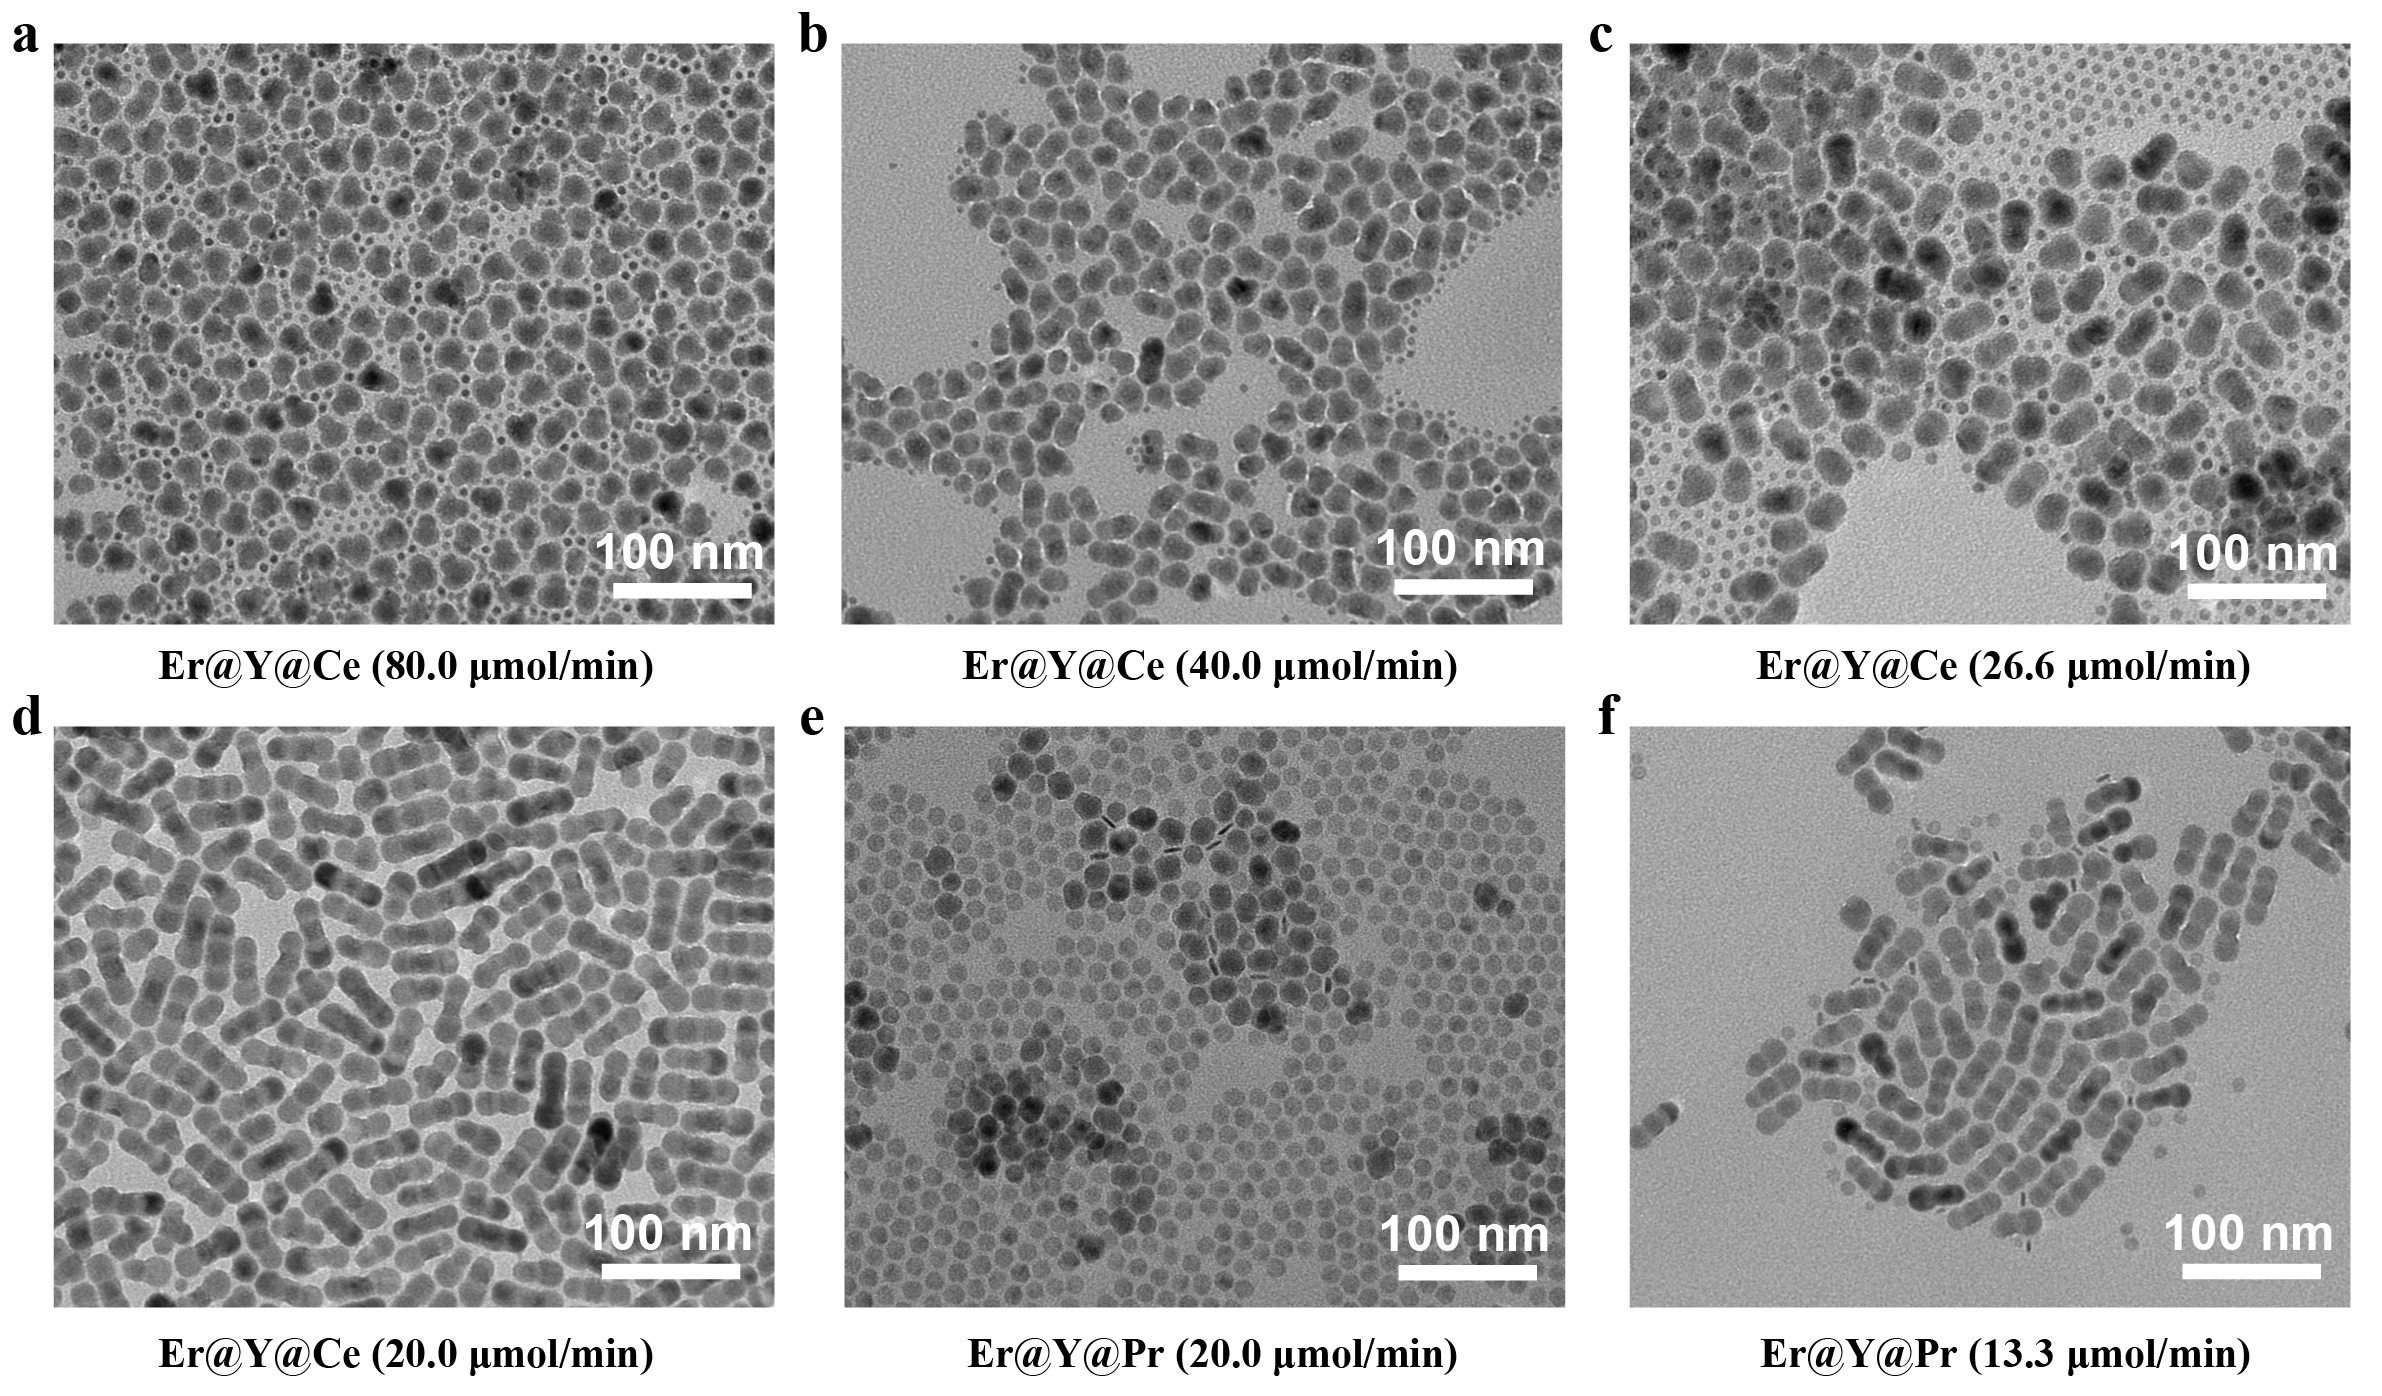


**Supplementary Figure 19.** TEM images of these as-synthesized NaErF4@NaYF4@NaCeF4 nanocrystals with corresponding injection rates 80.0 μmol/min (a), 40.0 μmol/min (b), 26.6 μmol/min (c), and 20.0 μmol/min (d), these as-synthesized NaErF4@NaYF4@NaPrF4 nanocrystals with corresponding injection rates 20.0 μmol/min (e), and 13.3 μmol/min (f).


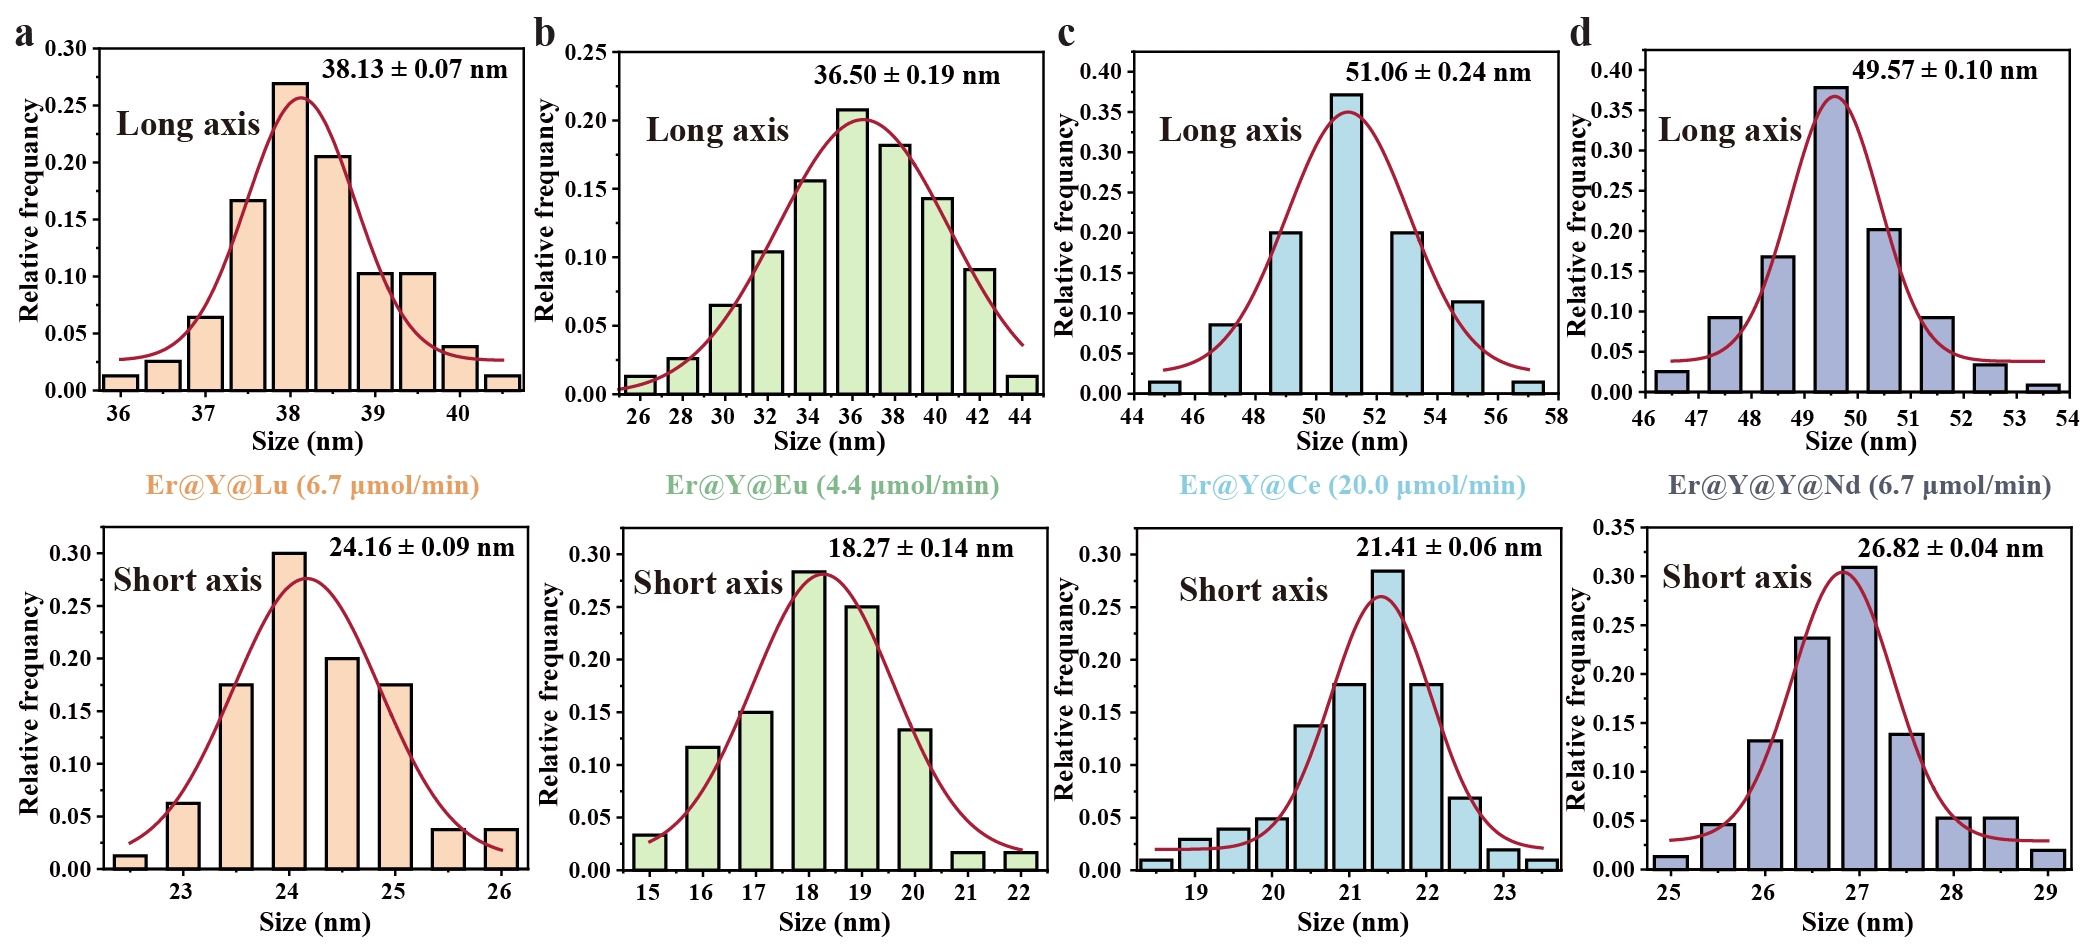


**Supplementary Figure 20.** Size distributions of the as-synthesized (a) NaErF4@NaYF4@NaLuF4 (6.7 μmol/min), (b) NaErF4@NaYF4@NaEuF4 (4.4 μmol/min), (c) NaErF4@NaYF4@NaCeF4 (20.0 μmol/min), (d) NaErF4@NaYF4@NaYF4@NaNdF4 (6.7 μmol/min) nanocrystals. The size distribution is fitted by a Gaussian curve (full red line).


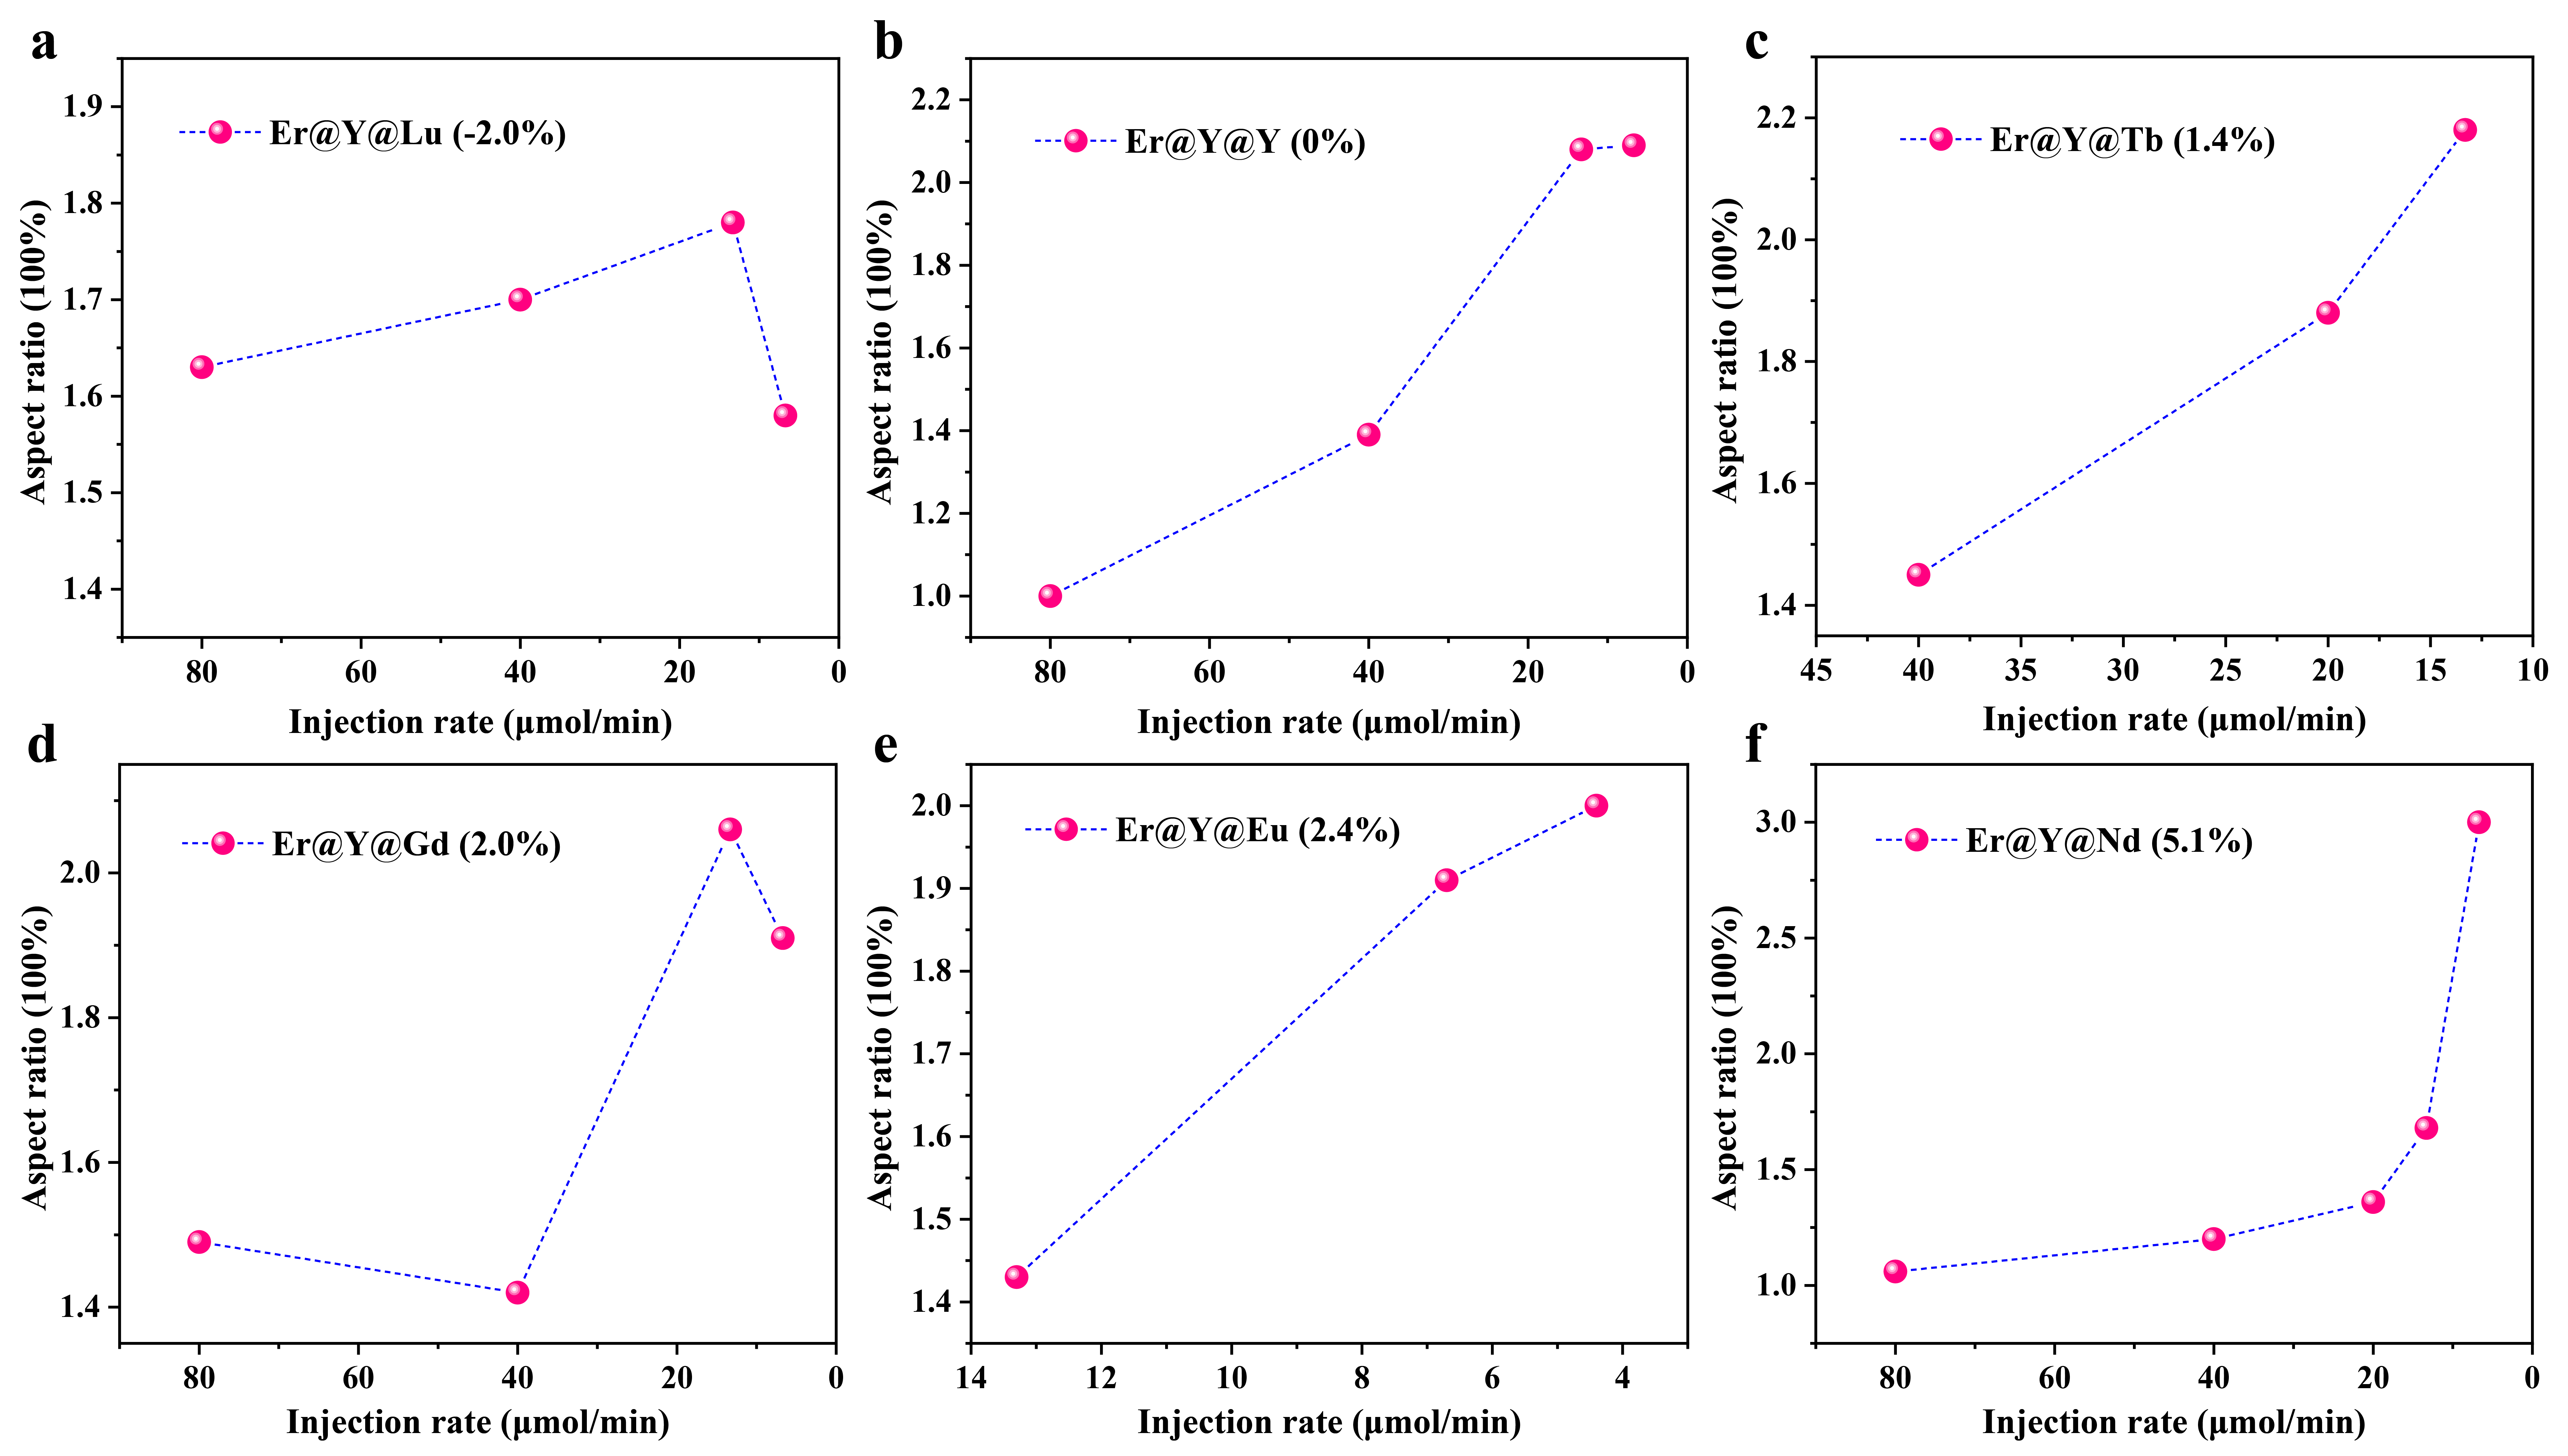


**Supplementary Figure 21.** **Aspect ratio analysis**. The ratio of long diameter to short diameter of these as-synthesized NaErF4@NaYF4@NaLuF4 (a), NaErF4@NaYF4@NaYF4 (b), NaErF4@NaYF4@NaTbF4 (c), NaErF4@NaYF4@NaGdF4 (d), NaErF4@NaYF4@NaEuF4 (e) and NaErF4@NaYF4@NaNdF4 (f) nanocrystals varies with injection rates.


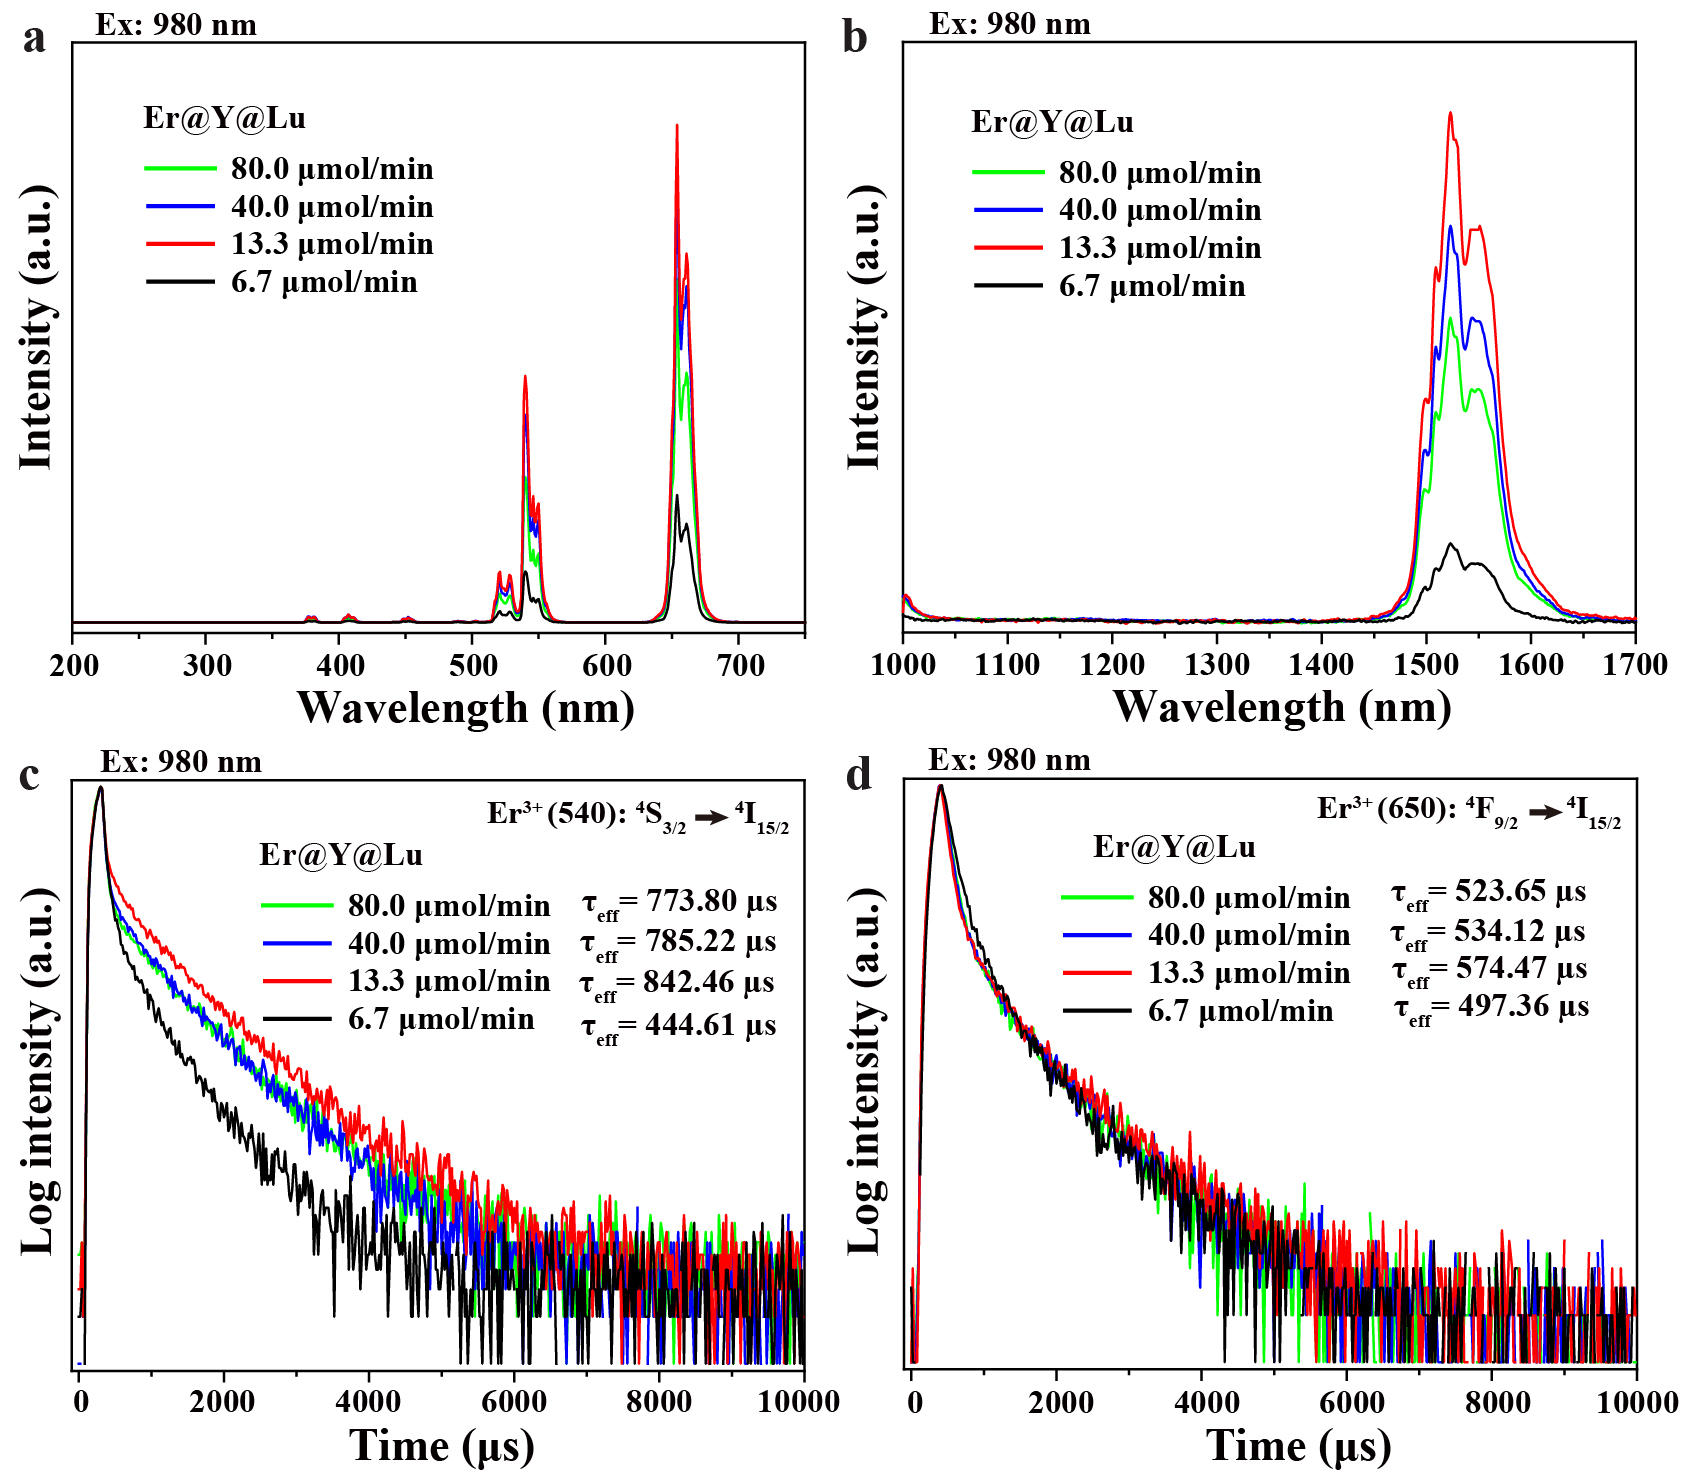


**Supplementary Figure 22.** Upconversion (a) and downshifting (b) emission spectra of these as-synthesized NaErF4@NaYF4@NaLuF4 nanocrystals with corresponding injection rates of 80.0 μmol/min, 40.0 μmol/min, 13.3 μmol/min and 6.7 μmol/min under 980 nm excitation. Comparison of upconversion luminescence decay curves of Er3+ emissions at 540 nm (c) and 650 nm (d) of these NaErF4@NaYF4@NaLuF4 nanocrystals.


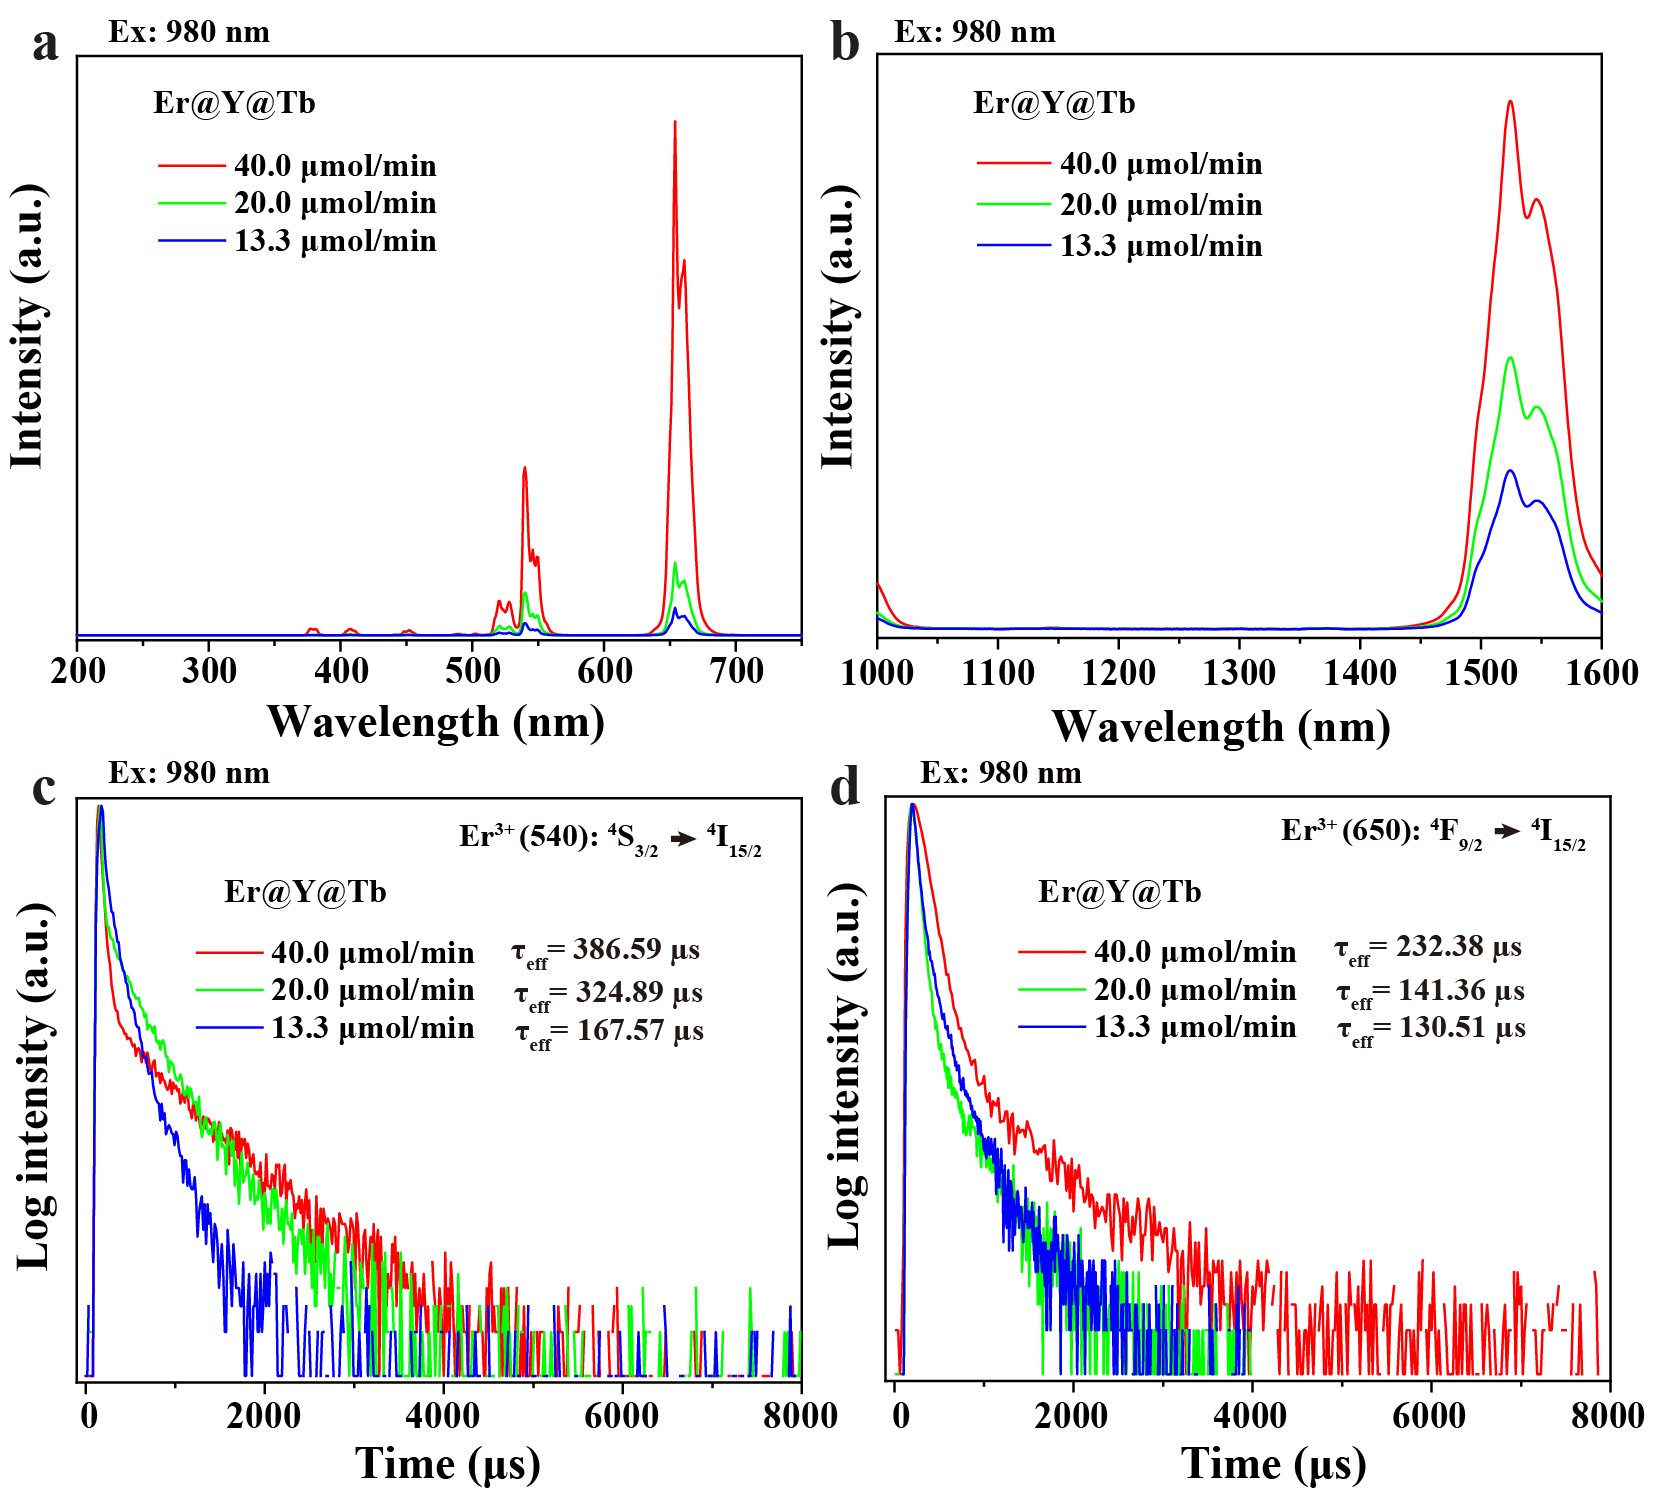


**Supplementary Figure 23.** Upconversion (a) and downshifting (b) emission spectra of these as-synthesized NaErF4@NaYF4@NaTbF4 nanocrystals with corresponding injection rates of 40.0 μmol/min, 20.0 μmol/min, 13.3 μmol/min under 980 nm excitation. Comparison of upconversion luminescence decay curves of Er3+ emissions at 540 nm (c) and 650 nm (d) of these NaErF4@NaYF4@NaTbF4 nanocrystals.


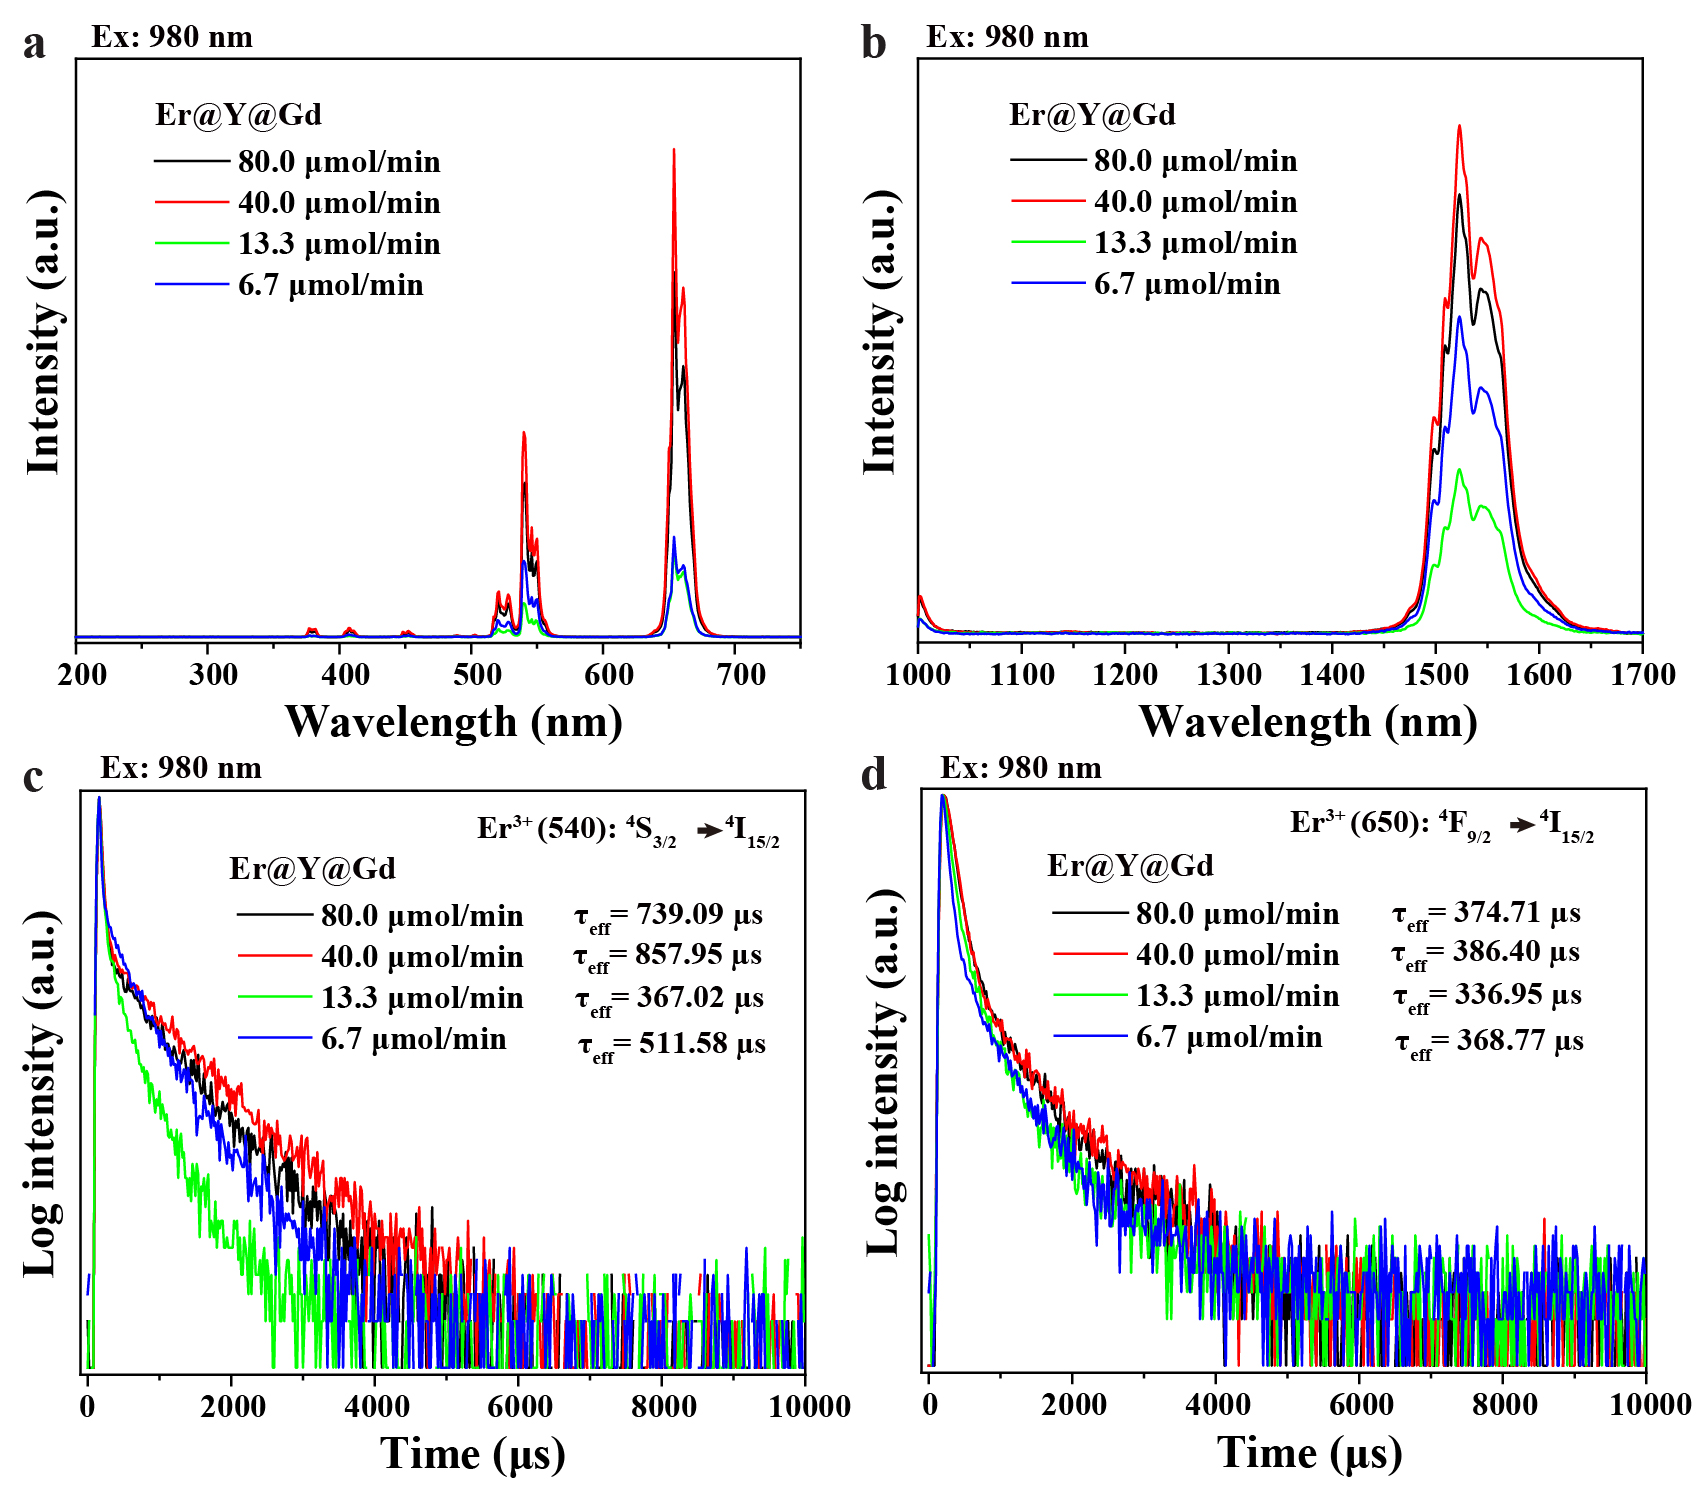


**Supplementary Figure 24.** Upconversion (a) and downshifting (b) emission spectra of these as-synthesized NaErF4@NaYF4@NaGdF4 nanocrystals with corresponding injection rates of 80.0 μmol/min, 40.0 μmol/min, 13.3 μmol/min and 6.7 μmol/min under 980 nm excitation. Comparison of upconversion luminescence decay curves of Er3+ emissions at 540 nm (c) and 650 nm (d) of NaErF4@NaYF4@NaGdF4 nanocrystals.


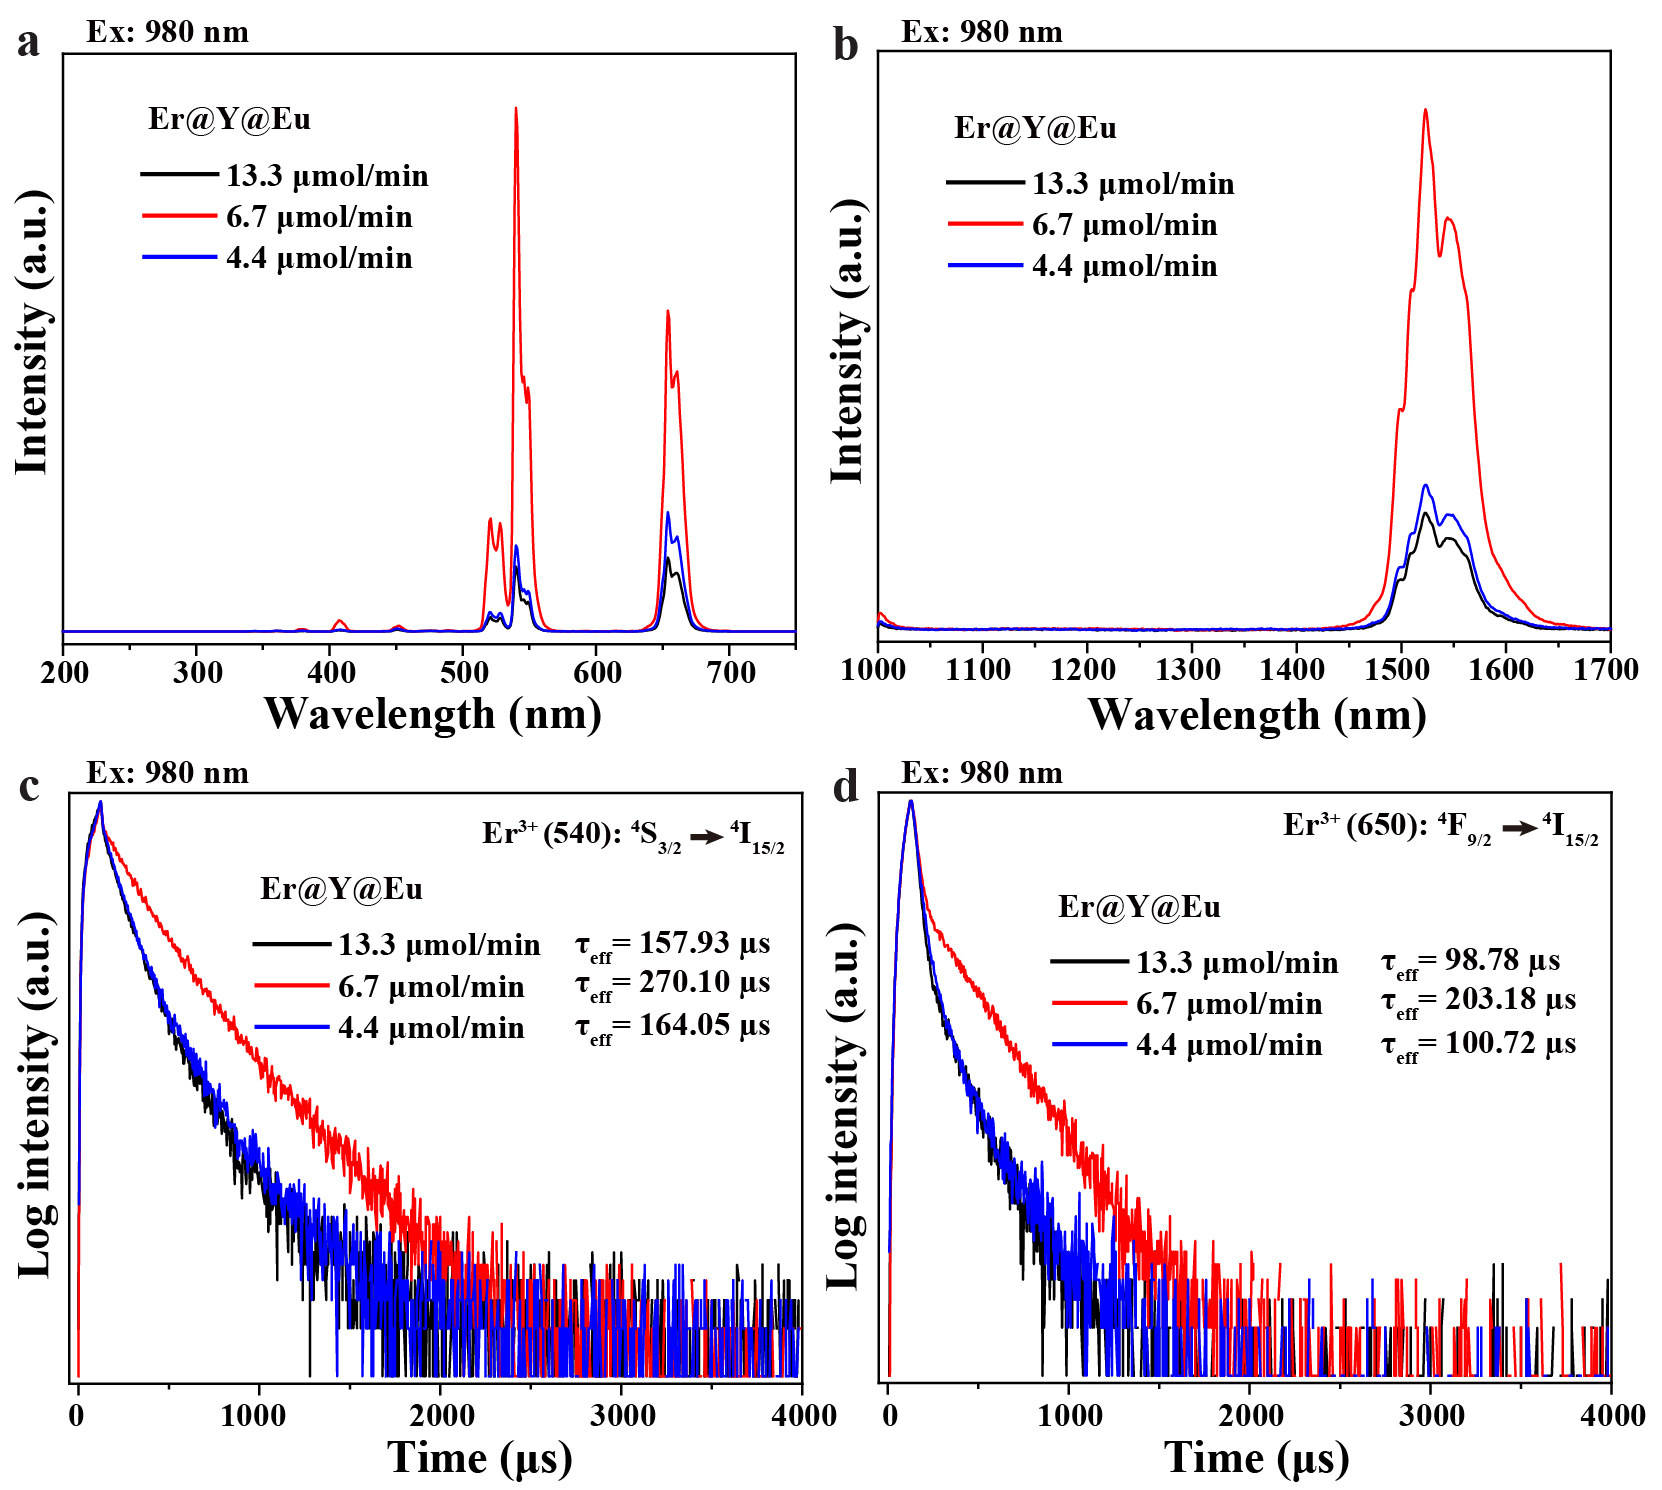


**Supplementary Figure 25.** Upconversion (a) and downshifting (b) emission spectra of these as-synthesized NaErF4@NaYF4@NaEuF4 nanocrystals with corresponding injection rates of 13.3 μmol/min, 6.7 μmol/min, and 4.4 μmol/min under 980 nm excitation. Comparison of upconversion luminescence decay curves of Er3+ emissions at 540 nm (c) and 650 nm (d) of NaErF4@NaYF4@NaEuF4 under 980 nm excitation.

**Supplementary Table 1.** DFT-calculated adsorption energies.

|  | **Adsorption energy without strain (eV)** | **Adsorption energy with strain (eV)** |
| --- | --- | --- |
| **Nd-adsorbed on the (0001) surface**  **(Er1 site)** | -2.307 | -2.246 |
| **Nd-adsorbed on the (0001) surface**  **(hollow site)** | -2.184 | -3.209 |
| **Nd-adsorbed on the (1000) surface**  **(Er site)** | -1.911 | -3.876 |
| **Nd-adsorbed on the (1000) surface**  **(hollow site)** | -4.158 | -6.087 |

**Supplementary Table 2.** Ionic radii of Ce3+, Pr3+, Nd3+, Eu3+, Gd3+, Tb3+, Y3+, Er3+, and Lu3+ ions. (Ionic radii of Ln3+ are for VIII coordinate species5).

| **Ions** | **Ce3+** | **Pr3+** | **Nd3+** | **Eu3+** | **Gd3+** | **Tb3+** | **Y3+** | **Er3+** | **Lu3+** |
| --- | --- | --- | --- | --- | --- | --- | --- | --- | --- |
| **Ionic Radii (Å)** | 1.283 | 1.266 | 1.249 | 1.206 | 1.193 | 1.180 | 1.159 | 1.144 | 1.117 |

**Supplementary Table 3.** The crystal lattice parameters of hexagonal phase (β)-NaREF4 crystals6 (NaYF4 refers to the XRD standard card PDF16-0334).

| 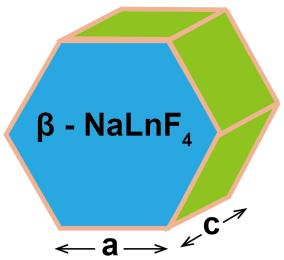  **Unit Cell parameters** | **Crystal Host** | NaLaF4 | **NaCeF4** | **NaPrF4** | **NaNdF4** | NaSmF4 | **NaEuF4** | **NaGdF4** | **NaTbF4** |
| --- | --- | --- | --- | --- | --- | --- | --- | --- | --- |
| **a & b(Å)** | 6.157 | **6.131** | **6.123** | **6.100** | 6.051 | **6.044** | **6.020** | **6.008** |
| **C(Å)** | 3.822 | **3.776** | **3.743** | **3.711** | 3.640 | **3.613** | **3.601** | **3.580** |
| **Year/Ref** | 1966/6 | 1966/6 | 1966/6 | 1966/6 | 1966/6 | 1966/6 | 1966/6 | 1966/6 |
| **Crystal Host** | NaHoF4 | NaDyF4 | **NaYF4** | **NaErF4** | NaTmF4 | NaYbF4 | **NaLuF4** | **-** |
| **a & b(Å)** | 5.991 | 5.985 | **5.96** | **5.959** | 5.953 | 5.929 | **5.912** | **-** |
| **C(Å)** | 3.528 | 3.554 | **3.53** | **3.514** | 3.494 | 3.471 | **3.458** | **-** |
| **Year/Ref** | 1966/6 | 1966/6 | PDF16-0334 | 1966/6 | 1966/6 | 1966/6 | 1966/6 | - |

**Supplementary Table 4.** Summary of the lattice mismatches for crystallographic parameters ***c***for a hexagonal phase NaREF4 crystals. The mismatches are calculated by the conventional definition7 given by .

| **Shell**  **Mismatch (%)**  **Core** | **NaCeF4** | **NaPrF4** | **NaNdF4** | **NaEuF4** | **NaGdF4** | **NaTbF4** | **NaYF4** | **NaLuF4** |
| --- | --- | --- | --- | --- | --- | --- | --- | --- |
| **NaYF4** | 7.0 | 6.0 | 5.1 | 2.4 | 2.0 | 1.4 | 0 | -2.0 |
| **NaErF4** | 7.5 | 6.5 | 5.6 | 2.8 | 2.5 | 1.9 | 0.5 | -1.6 |

**Supplementary Table 5.** Summary of the lattice mismatches for crystallographic parameters ***a*** *&* ***b***for a hexagonal phase NaREF4 crystals. The mismatches are calculated in the same method as in Supplementary Table 4.

| **Shell**  **Mismatch (%)**  **Core** | **NaCeF4** | **NaPrF4** | **NaNdF4** | **NaEuF4** | **NaGdF4** | **NaTbF4** | **NaYF4** | **NaLuF4** |
| --- | --- | --- | --- | --- | --- | --- | --- | --- |
| **NaYF4** | 2.9 | 2.7 | 2.3 | 1.4 | 1.0 | 0.8 | 0 | -0.8 |
| **NaErF4** | 2.9 | 2.8 | 2.4 | 1.4 | 1.0 | 0.8 | 0.02 | -0.8 |

**Supplementary References**

1. Kresse, G. & Furthmüller, J. Efficiency of ab-initio total energy calculations for metals and semiconductors using a plane-wave basis set. *Comput. Mater. Sci.* **6**, 15–50 (1996).

2. Blöchl, P. E. Projector augmented-wave method. *Phys. Rev. B* **50**, 17953–17979 (1994).

3. Perdew, J. P., Burke, K. & Ernzerhof, M. Generalized gradient approximation made simple. *Phys. Rev. Lett.* **77**, 3865–3868 (1996).

4.Xu, H. et al. Anomalous upconversion amplification induced by surface reconstruction in lanthanide sublattices. *Nat. Photonics* **15**, 732–737 (2021).

5. Shannon, R. D. Revised effective ionic radii and systematic studies of interatomic distances in halides and chalcogenides. *Acta Cryst.* **A32**, 751-767 (1976).

6. Thoma, R. E., Insley, H. & Hebert, G. M. The sodium fluoride-lanthanide trifluoride systems. *Inorg. Chem.* **5**, 1222–1229 (1966).

7. Zhang, J., Tang, Y., Lee, K. & Ouyang, M. Nonepitaxial growth of hybrid core-shell nanostructures with large lattice mismatches. *Science* **327**, 1634–1638 (2010).
